# Supplementary material for: Quantifying individual (anti)bonding molecular orbitals’ contributions to chemical bonding
Source: Royal Society of Chemistry journal article supplement (doi:10.1039/c9cp04345d), 2019-01-01
Supplement: c9cp04345d1.pdf [file c9cp04345d1.pdf]

# Quantifying individual (anti)bonding molecular orbitals' contributions to chemical bonding

*Jurgens H. de Lange, Daniël M.E. van Niekerk, Ignacy Cukrowski\**

*Department of Chemistry, Faculty of Natural and Agricultural Sciences, University of Pretoria, Lynnwood Road,  
Hatfield, Pretoria 0002, South Africa*

Correspondence to: Ignacy Cukrowski (E-mail: ignacy.cukrowski@up.ac.za)

## Electronic Supplementary Information

| <b>Table of content</b>                                                                | <b>Page</b> |
|----------------------------------------------------------------------------------------|-------------|
| <b>Part 1</b><br>Theoretical background and development of the MO-ED and MO-DI methods | 2           |
| <b>Part 2</b><br>XYZ coordinates of all optimized molecules                            | 8           |
| <b>Part 3</b><br>Data pertaining to the CO molecule                                    | 10          |
| <b>Part 4</b><br>Data pertaining to the N <sub>2</sub> molecule                        | 13          |
| <b>Part 5</b><br>Data pertaining to the H <sub>2</sub> molecule                        | 17          |
| <b>Part 6</b><br>Data pertaining to the Cr <sub>2</sub> molecule                       | 20          |
| <b>Part 7</b><br>Data pertaining to the LiH                                            | 23          |

## Part 1

# Theoretical background and development of the MO-ED and MO-DI methods

### The MO-ED Method

The MO-ED method seeks to describe the total electron density, as well as its topology, in terms of molecular orbital density contributions. Specifically, we aim here to describe the presence of a density bridge, with its associated critical point, in terms of MO densities. To do so we will first review some preceding topics related to the topology of the electron density.

#### *The topology of the electron density*

Within the field of Quantum Chemical Topology (QCT), a critical point (CP) in the electron density (ED) at a coordinate  $\mathbf{r}_c$  is a local maximum, minimum or a saddle point where the first derivative (and each of its three components) vanishes:

$$\nabla\rho(r_c) = i\frac{\partial\rho}{\partial x} + j\frac{\partial\rho}{\partial y} + k\frac{\partial\rho}{\partial z} = 0 \quad (1)$$

Each  
h  
CP

is a local maximum or minimum along each of the three principle axes corresponding to maximum curvature. The type of CP can be determined by evaluating components of the Hessian matrix, which describe the partial second derivatives of the ED at  $\mathbf{r}_c$ :

$$A(r_c) = \begin{pmatrix} \frac{\partial^2\rho}{\partial x^2} & \frac{\partial^2\rho}{\partial x\partial y} & \frac{\partial^2\rho}{\partial x\partial z} \\ \frac{\partial^2\rho}{\partial y\partial x} & \frac{\partial^2\rho}{\partial y^2} & \frac{\partial^2\rho}{\partial y\partial z} \\ \frac{\partial^2\rho}{\partial z\partial x} & \frac{\partial^2\rho}{\partial z\partial y} & \frac{\partial^2\rho}{\partial z^2} \end{pmatrix} \quad (2)$$

The  
Hes  
sian  
mat  
rix  
can  
be

diagonalized to give three curvatures along the principle axes at  $\mathbf{r}_c$ , yielding three eigenvalues,  $\lambda_1$ ,  $\lambda_2$  and  $\lambda_3$ , and associated eigenvectors. The sign of each eigenvalue reveals whether  $\mathbf{r}_c$  is a local minimum or maximum along the associated eigenvector, where positive and negative eigenvalues relate to local minima and maxima, respectively.

Each CP can be classified according to its partial first and second derivatives, and is given a rank,  $\omega$ , and signature,  $\sigma$ . The rank determines the number of non-zero curvatures (eigenvalues of

the Hessian matrix). In other words, a rank of (+3) indicates that a CP is a local maximum or minimum in all three principle axes. The signature is the algebraic sum of the signs of the eigenvalues, and a signature of (-1) indicates that  $\mathbf{r}_c$  is a local minimum in one axis but a local maximum in the remaining two axes (+1 -1 -1 = -1). While many CPs of rank 1 and 2 exist in any ED distribution, only a number of CPs of rank 3 will exist, subject to the Poincaré-Hopf relationship,<sup>1</sup> and rank 3 CPs are therefore of particular use in QCT.

The topology of the ED is generally dominated by the electrostatic attractive force between nuclei and electrons, and as such, every nuclear coordinate is marked by a (+3,-3) CP – a local maximum in all three principle axes. (+3,-1) CPs are often found between pairs of nuclei and are known as bond critical points (BCPs). CPs found within a ring of nuclei are (+3,+1) CPs, known as ring critical points (RCPs), and a CP enclosed by a number of ring critical points is always a (+3,+3) CP, known as a cage critical point (CCP).

QCT has revealed a peculiar property regarding the ED distribution between nuclei. A BCP is always observed at the interface between two zero-flux surfaces outside of the limit at infinity, *i.e.* interatomic zero-flux surfaces. Two gradient vectors originate at each of the enclosed nuclei and terminate at the BCP. The path defined by these two vectors is known as a density bridge (DB, also known as a *bond path* or a *line path*<sup>2</sup>). The ED is at a local maximum perpendicular to the DB at each and every coordinate of the DB. A DB is a remarkable yet still misunderstood property of the ED. The collection of DBs gives rise to a *molecular graph*, which defines QTAIM-based atomic connectivity.

Two of the eigenvalues of the Hessian matrix ( $\lambda_1$  and  $\lambda_2$ ) will be negative at each and every coordinate of a DB, indicating a negative partial second derivative along the principle vectors perpendicular to the DB itself. A negative partial second derivative at  $\mathbf{r}$ ,  $\frac{\partial^2 \rho(\mathbf{r})}{\partial \mathbf{r}^2}$ , can be seen as a measure of local *concentration* of the ED, in that the ED at  $\mathbf{r}$  is greater than the average of its neighbouring coordinates along a specific vector.<sup>7</sup> Along the DB, the third eigenvalue of the Hessian matrix ( $\lambda_3$ ) will always be positive, indicating a local *depletion* of ED. Generally, at a given coordinate  $\mathbf{r}$  along an internuclear vector and as long the two nuclei are not part of a cage,  $\lambda_1 < 0$  and  $\lambda_3 > 0$ . The sign of the remaining eigenvalue,  $\lambda_2$ , then generally determines whether ED is concentrated at  $\mathbf{r}$  relative to its neighbouring environment, thereby forming an DB if a CP is present, or whether the ED is depleted. Such concentrations and depletions have been used extensively by both QTAIM and other QCT techniques, such as the Noncovalent Interactions (NCI) technique,<sup>3,4</sup> to indicate ‘*attractive*’ or ‘*repulsive*’ interactions. However, some of us

previously showed<sup>5</sup> that measures of ED concentration utilising  $\lambda_2$  is only a relative to the local environment where it is measured.

### ***Cross-sections along $\lambda_2$ -eigenvector***

As stated above, the presence of a DB can be fully determined in most circumstances from investigation of i) the partial directional first derivative and ii) the sign of the partial directional second derivative of the ED along the eigenvector associated with the  $\lambda_2$  eigenvalue of the Hessian matrix. We will henceforth refer to this eigenvector simply as the  $\lambda_2$ -eigenvector. We have previously noted<sup>5,6</sup> that the ED distribution, as well as decompositions of the ED, of cross-sections along this vector can provide tremendous information regarding *why* a DB for a particular chemical interaction is present or not. Specifically, the overall concentration or depletion of ED along the  $\lambda_2$ -eigenvector provides valuable information regarding the character of the interaction, and the individual concentration or depletion of ED decomposition products can provide insight into the underlying mechanics. Cross-sections along one of the other principle axes, *i.e.*  $\lambda_1$ - or  $\lambda_3$ -eigenvectors, can provide useful information regarding the ED concentration/depletion relative to different interatomic interactions.

### ***Decomposition of ED and its topology in terms of MO densities***

The ED can easily be decomposed in terms of canonical or natural molecular orbitals (MOs),

$$\rho(r) = \sum_i^{N_{MO}} v_i |\chi_i(r)|^2 \quad (3)$$

where  $\chi_i$  is an MO with occupation  $v_i$ . The coordinate  $\mathbf{r}$  can be varied (specifically, in this case, along the  $\lambda_2$ -eigenvector) in order to measure the orbital contributions to the ED in a region of real-space, as well as then calculate partial directional first and second derivatives.

It is useful to define a consistent and universal coordinate,  $\mathbf{r}^*$ , which can be used to quantify an orbital's ED contribution to any internuclear region in a transferable fashion. While there are potentially multiple different approaches to define such an  $\mathbf{r}^*$ , we have decided to use the topology of the ED as a general guide. If a (3,-1) CP is present, then we define  $\mathbf{r}^* = \mathbf{r}_c$ , the coordinate of the CP. If a (3,-1) CP is not present, then we set  $\mathbf{r}^*$  to be the position of the minimum density point (MDP)<sup>15</sup>, which is defined as the coordinate on an internuclear vector

where the ED is at a minimum. The MDP is well-defined for any given atom-pair, and the MDP and BCP often coincides to the same coordinate unless the corresponding DB is particularly bent.

Next, we consider the partial directional second derivatives along the  $\lambda_2$ -eigenvector of each

MO density as measured at  $\mathbf{r}^*$ ,  $\frac{\partial^2 v_i |\chi_i(\mathbf{r}^*)|^2}{\partial \lambda^2}$ . We can label each MO as concentrating ED (negative second derivative), depleting ED (positive second derivative), non-contributing to the ED (in the case of an MO node) or removing ED (in the case of negative occupations in multi-reference wavefunctions). The ED at  $\mathbf{r}^*$  can then be defined in terms of MO components with different characters:

$$\begin{aligned} \rho(\mathbf{r}^*) = & \rho_{concentrating}(\mathbf{r}^*) + \rho_{depleting}(\mathbf{r}^*) + \rho_{non-contributing}(\mathbf{r}^*) \\ & + \rho_{removing}(\mathbf{r}^*) \end{aligned} \quad (4)$$

Each individual MO's character is therefore defined relative to a specific internuclear region, as opposed to a "net" character given based on inspection of molecular-wide isosurface or interference patterns of atomic orbitals. In the main body of this text, we investigate the similarities of orbitals with similar characters for various di- and polyatomic molecules.

## **The MO-DI Method**

The MO-DI method describes the QTAIM-defined delocalization index in terms of MO contributions to the pair-density. We will first review the basic concepts of how delocalization indices are calculated within QTAIM.

The integration of the overlap between all MO pairs over a QTAIM-defined atomic domain,  $\Omega(A)$ , can be written as a matrix associated with atom A,  $S^A$ , and is known as an *atomic overlap matrix* (AOM).<sup>1</sup> The elements of an  $N_{MO}$  by  $N_{MO}$  atomic overlap matrix,

$$S_{ij}^A = \sum_{ij} \int_A \sqrt{v_i} \sqrt{v_j} \chi_i^*(r) \chi_j(r) dr \quad (7)$$

provide information on how each MO (diagonal elements) or a MO-pair (off-diagonal elements) contribute to the ED distribution of atom A. The atomic population (the average number of electrons found in the atomic basin) is therefore simply the sum of diagonal elements of the AOM:

$$N(A) = tr(S^A) \quad (8)$$

The off-diagonal elements of each AOM, however, provide valuable information regarding the 2<sup>nd</sup>-order density distribution across the atom, *i.e.* how MOs interfere (de)constructively within  $\Omega(A)$ .<sup>8,9</sup> Such information can be used to indicate the degree of localization or delocalization of electrons within the atomic basin. Specifically, by integrating the pair density across two domains simultaneously, the total electron delocalization between electrons in each basin can be calculated:

$$\begin{aligned}\delta(A,B) &= 2 \left| - \sum_{ij} \int_A dr_1 \int_B dr_2 v_i v_j \{ \chi_i^*(r_1) \chi_j(r_1) \chi_j^*(r_2) \chi_i(r_2) \} \right| \\ &= 2 \left| - \sum_{ij} S_{ij}^A S_{ji}^B \right|\end{aligned}\tag{9}$$

where we have used the definition for the elements of the AOM from Eq. 7.  $\delta(A,B)$  is known as the delocalization index (DI)<sup>10,11</sup> for atom pair A,B. In single-determinant wavefunctions, it is often calculated by only considering spin-orbitals between parallel spin electrons, in order to calculate only the delocalization arising from Fermi correlation. Finally, note that the integrations can be swapped ( $d\mathbf{r}_1$  over  $\Omega(B)$ ,  $d\mathbf{r}_2$  over  $\Omega(A)$ ) which will give the equivalent number of electrons, indicating that the number of electrons found on average in  $\Omega(A)$  but delocalized into  $\Omega(B)$  is the same as the number of electrons found on average in  $\Omega(B)$  but delocalized into  $\Omega(A)$ ; hence, the factor of 2 in Eq. 9.

Since Eq. 9 is written in terms of MOs, it is easy to recover the contribution of each MO and MO-pair to the total DI. A delocalized density matrix can be easily defined in terms of AOM elements:

$$D_{ij}^{(A,B)} = 2 \left| - S_{ij}^A S_{ji}^B \right|\tag{10}$$

Diagonal elements of this matrix,  $D_{ii}^{(A,B)}$ , provides the contributions of each MO's contribution to the total number of electron pairs shared between A and B. However, the off-diagonal elements,  $D_{i \neq j}^{(A,B)}$ , provides the extent to which an MO-pair increases delocalized electron pairs (through constructive interference) or decreases delocalized electron pairs (through deconstructive interference). Therefore, the sum of any row or column of  $\mathbf{D}_{ij}$  gives the net contribution of an MO to the number of electron pairs shared between atoms A and B, after any MO-pair interference effects have been taken into account.

| MO         | MO 1  | MO 2  | MO 3  | MO 4  | MO 5  | MO 6 | MO 7 |
|------------|-------|-------|-------|-------|-------|------|------|
| MO 1       | 1.00  | -1.00 | 0.00  | 0.00  | 0.00  | 0.00 | 0.00 |
| MO 2       | -1.00 | 1.00  | 0.00  | 0.00  | 0.00  | 0.00 | 0.00 |
| MO 3       | 0.00  | 0.00  | 1.00  | -0.27 | 0.00  | 0.00 | 0.00 |
| MO 4       | 0.00  | 0.00  | -0.27 | 1.00  | -0.71 | 0.00 | 0.00 |
| MO 5       | 0.00  | 0.00  | 0.00  | -0.71 | 1.00  | 0.00 | 0.00 |
| MO 6       | 0.00  | 0.00  | 0.00  | 0.00  | 0.00  | 1.00 | 0.00 |
| MO 7       | 0.00  | 0.00  | 0.00  | 0.00  | 0.00  | 0.00 | 1.00 |
| Sum        | 0.00  | 0.00  | 0.73  | 0.02  | 0.29  | 1.00 | 1.00 |
| Percentage | 0%    | 0%    | 24%   | 1%    | 10%   | 33%  | 33%  |

**Figure S1.1. Delocalized matrix for N<sub>2</sub>, as calculated at HF/6-311++G(2df,2pd) level.**

For instance, consider the MOs in N<sub>2</sub>, as calculated by HF/6-311++G(2df,2pd), shown in Figure S3.4. The delocalized matrix **D** is shown below, in Figure S1.1. The core 1s<sub>N</sub> orbitals form a bonding and antibonding pair,  $\chi_1$  and  $\chi_2$ . Both MOs contribute 1 electron pair to the total DI ( $D_{11}^{(A,B)} = D_{22}^{(A,B)} = 1.0$ ). However, the two orbitals are out-of-phase with each other, and interfere destructively so that  $D_{12}^{(A,B)} = D_{21}^{(A,B)} = -1.0$ . Therefore, the net contribution of MOs 1 and 2 is 0 electron pairs each. However,  $\chi_3$  – a  $\sigma$ -bonding MO – also contributes 1.0 electron pairs to the total DI, but interferes only weakly with  $\chi_4$  – a  $\sigma$ -antibonding MO. The net contribution of  $\chi_3$  is then 0.72 electron pairs. Finally,  $\chi_4$  interferes destructively with both  $\chi_3$  and  $\chi_5$  (the second  $\sigma$ -bonding MO), thereby bringing its net contribution down to only 0.02 electron pairs.

## References

1. R. F. Bader. In *Atoms in molecules*; Wiley Online Library, **1990**.
2. S. Shahbazian. *Chem. Eur. J.* **2018**, doi: 10.1002/chem.201705163.
3. J. Contreras-García; E. R. Johnson; S. Keinan; R. Chaudret; J.-P. Piquemal; D. N. Beratan; W. Yang. *J. Chem. Theory Comput.* **2011**, *7*, 625-632.
4. A. Otero-de-la-Roza; E. R. Johnson; J. Contreras-García. *PCCP* **2012**, *14*, 12165-12172.
5. I. Cukrowski; J. H. de Lange; A. S. Adeyinka; P. Mangondo. *Comput. Theor. Chem.* **2015**, *1053*, 60-76.
6. J. H. de Lange; D. M. van Niekerk; I. Cukrowski. *J. Comput. Chem.* **2018**, *39*, 973-985.
7. J. H. Lange; I. Cukrowski. *J. Comput. Chem.* **2017**, *38*, 981-997.
8. R. F. Bader. *Monatshefte für Chemie/Chemical Monthly* **2005**, *136*, 819-854.
9. F. Cortés-Guzmán; R. F. Bader. *Coord. Chem. Rev.* **2005**, *249*, 633-662.
10. R. F. Bader; M. E. Stephens. *J. Am. Chem. Soc.* **1975**, *97*, 7391-7399.
11. R. Daudel; R. Bader; M. Stephens; D. Borrett. *Can. J. Chem.* **1974**, *52*, 1310-1320.

## Part 2

### XYZ coordinates of all optimized molecules

**Table 2.1.** Cartesian coordinates of H<sub>2</sub> (*eq*) dimer at rhf/6-311++g(2df,2pd) level.

| Atom | X        | Y        | Z         |
|------|----------|----------|-----------|
| H    | 0.000000 | 0.000000 | 0.367136  |
| H    | 0.000000 | 0.000000 | -0.367136 |

**Table 2.2.** Cartesian coordinates of H<sub>2</sub> (*eq*) dimer at rccsd(full)/6-311++g(2df,2pd) level.

| Atom | X        | Y        | Z         |
|------|----------|----------|-----------|
| H    | 0.000000 | 0.000000 | 0.371312  |
| H    | 0.000000 | 0.000000 | -0.371312 |

**Table 2.3.** Cartesian coordinates of CO (*eq*) dimer at rhf/6-311++g(2df,2pd) level.

| Atom | X        | Y        | Z         |
|------|----------|----------|-----------|
| C    | 0.000000 | 0.000000 | -0.631980 |
| O    | 0.000000 | 0.000000 | 0.471217  |

**Table 2.4.** Cartesian coordinates of CO (*eq*) dimer at rccsd(full)/6-311++g(2df,2pd) level.

| Atom | X        | Y        | Z         |
|------|----------|----------|-----------|
| C    | 0.000000 | 0.000000 | -0.643051 |
| O    | 0.000000 | 0.000000 | 0.482288  |

**Table 2.5.** Cartesian coordinates of N<sub>2</sub> (*eq*) dimer at rhf/6-311++g(2df,2pd) level.

| Atom | X        | Y        | Z         |
|------|----------|----------|-----------|
| N    | 0.000000 | 0.000000 | 0.533148  |
| N    | 0.000000 | 0.000000 | -0.533148 |

**Table 2.6.** Cartesian coordinates of N<sub>2</sub> (*eq*) dimer at rccsd(full)/6-311++g(2df,2pd) level.

| Atom | X        | Y        | Z         |
|------|----------|----------|-----------|
| N    | 0.000000 | 0.000000 | 0.547282  |
| N    | 0.000000 | 0.000000 | -0.547282 |

**Table 2.7.** Cartesian coordinates of Cr<sub>2</sub> (*eq*) dimer at b3lyp/6-311++g(2df,2pd) level.

| Atom | X        | Y        | Z         |
|------|----------|----------|-----------|
| Cr   | 0.000000 | 0.000000 | 0.878807  |
| Cr   | 0.000000 | 0.000000 | -0.878807 |

**Table 2.8.** Cartesian coordinates of Li<sub>2</sub>H<sub>2</sub> (*eq*) at rhf/6-311++g(2df,2pd) level.

| Atom | X        | Y         | Z         |
|------|----------|-----------|-----------|
| Li   | 0.000000 | 0.000000  | -1.136802 |
| H    | 0.000000 | 1.358612  | 0.000000  |
| Li   | 0.000000 | 0.000000  | 1.136802  |
| H    | 0.000000 | -1.358612 | 0.000000  |



**Table 2.9.** Cartesian coordinates of  $\text{Li}_2\text{H}_2$  (*eq*) at rccsd(full)/6-311++g(2df,2pd) level.

| Atom | X         | Y         | Z        |
|------|-----------|-----------|----------|
| Li   | 0.000006  | -1.127827 | 0.000000 |
| H    | -1.336426 | -0.000012 | 0.000000 |
| Li   | 0.000006  | 1.127831  | 0.000000 |
| H    | 1.336391  | 0.000000  | 0.000000 |

## Part 3

### Data pertaining to the CO molecule

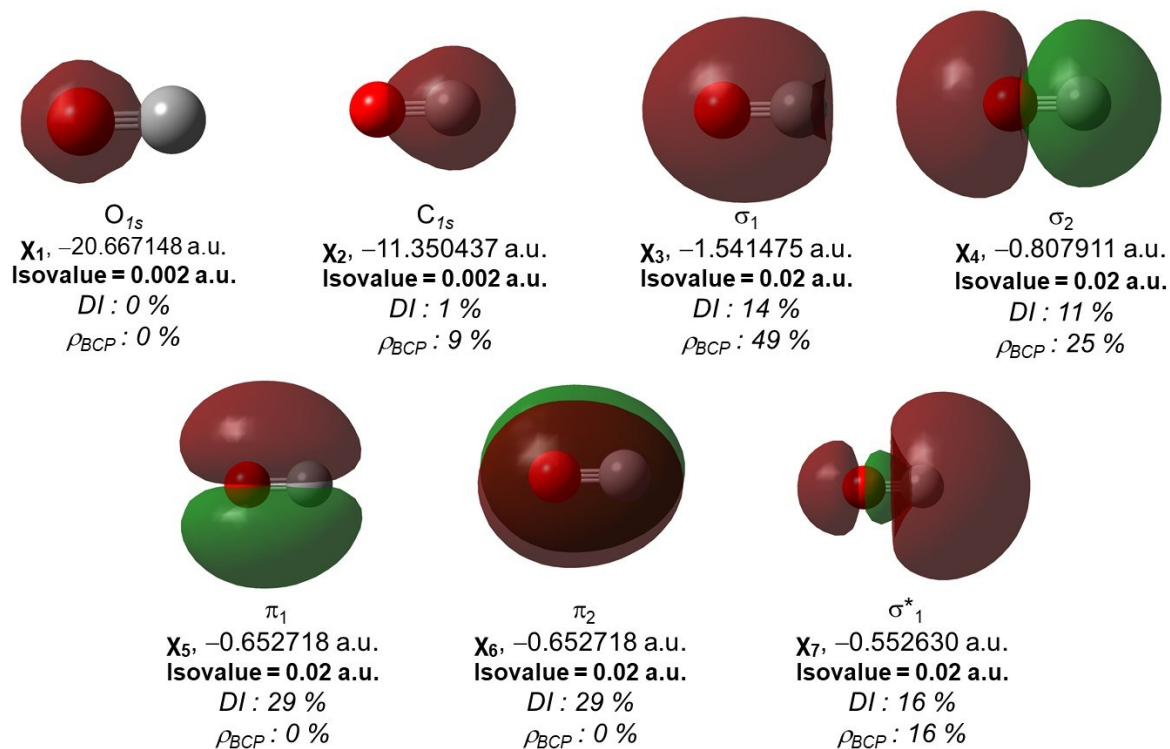

**Figure 4.1.** 3D-isosurfaces of MOs of CO at HF/6-311++G(2df,2pd) level. Percentage contributions to the  $DI(C,O)$  as well as to the electron density at the (3,-1) CP(C,O) are also shown.

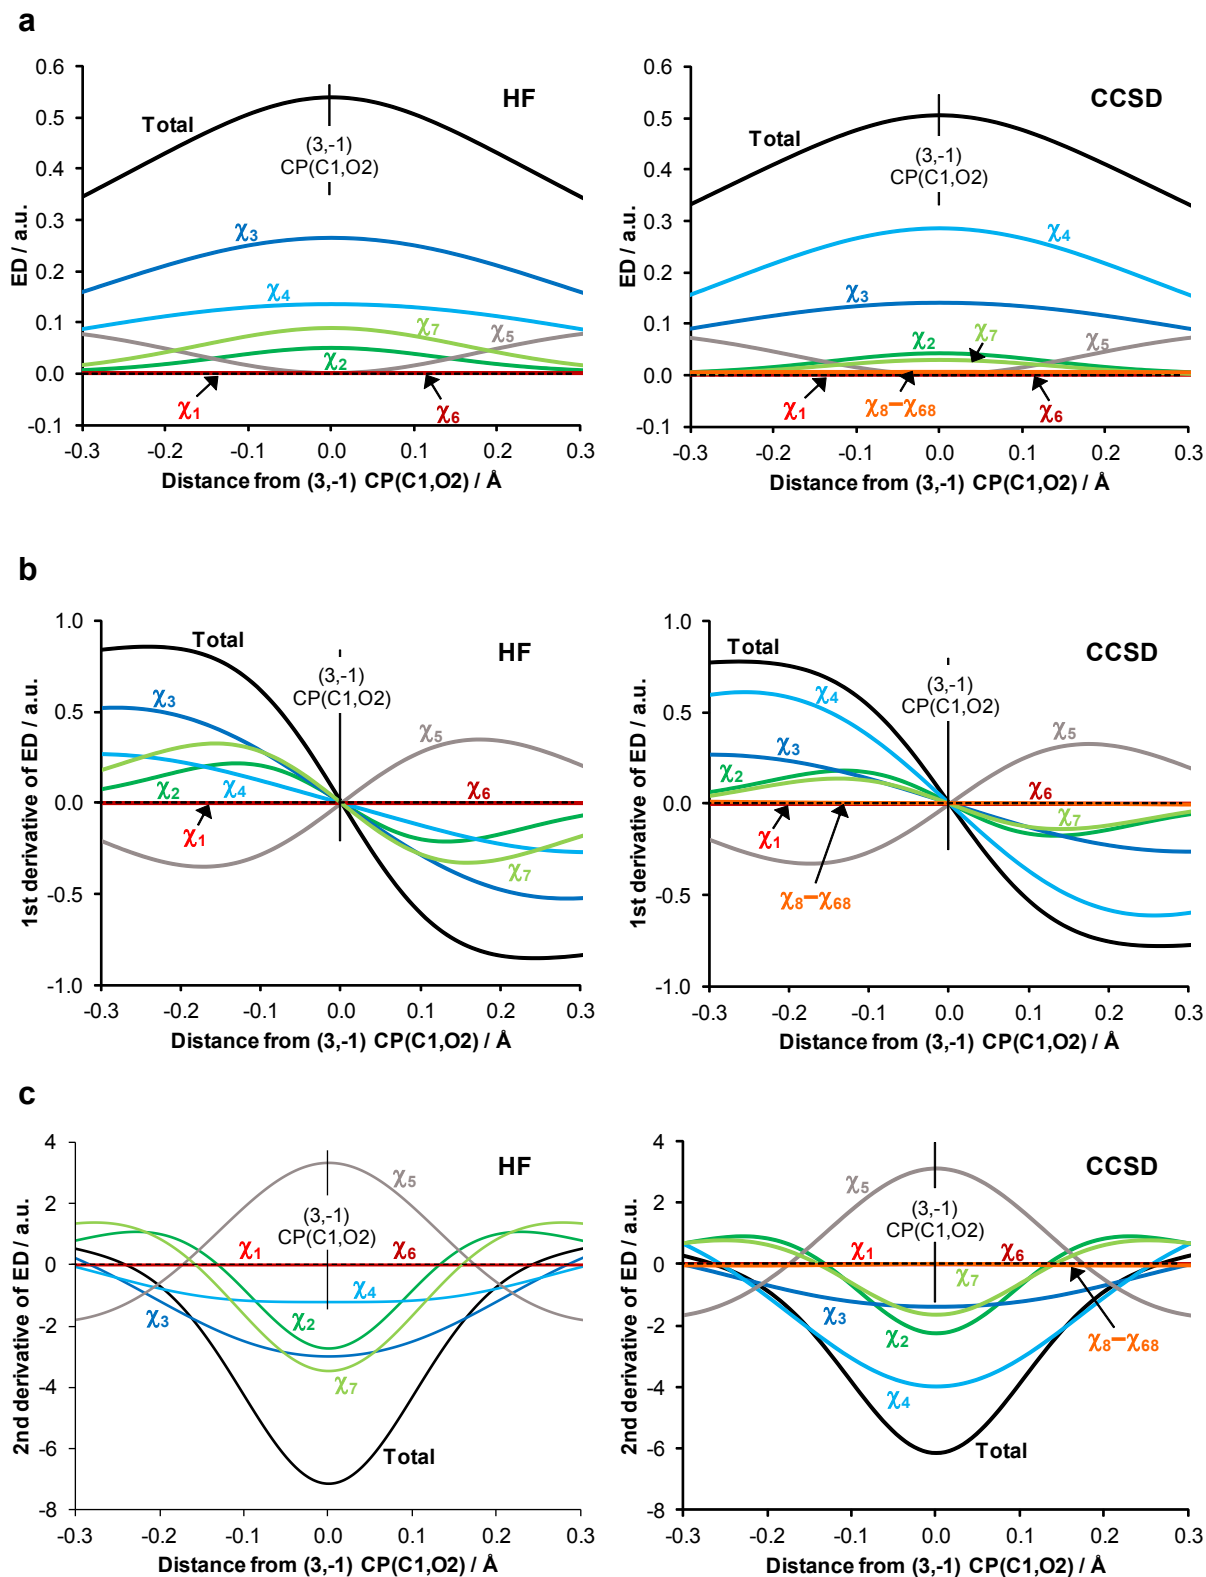

**Figure 4.2.** 1D-cross-sections along  $\lambda_2$ -eigenvector of MOs (HF) and NOs (CCSD) of CO. a) Total density contribution, b) directional partial 1<sup>st</sup> derivative and c) directional partial 2<sup>nd</sup> derivative.

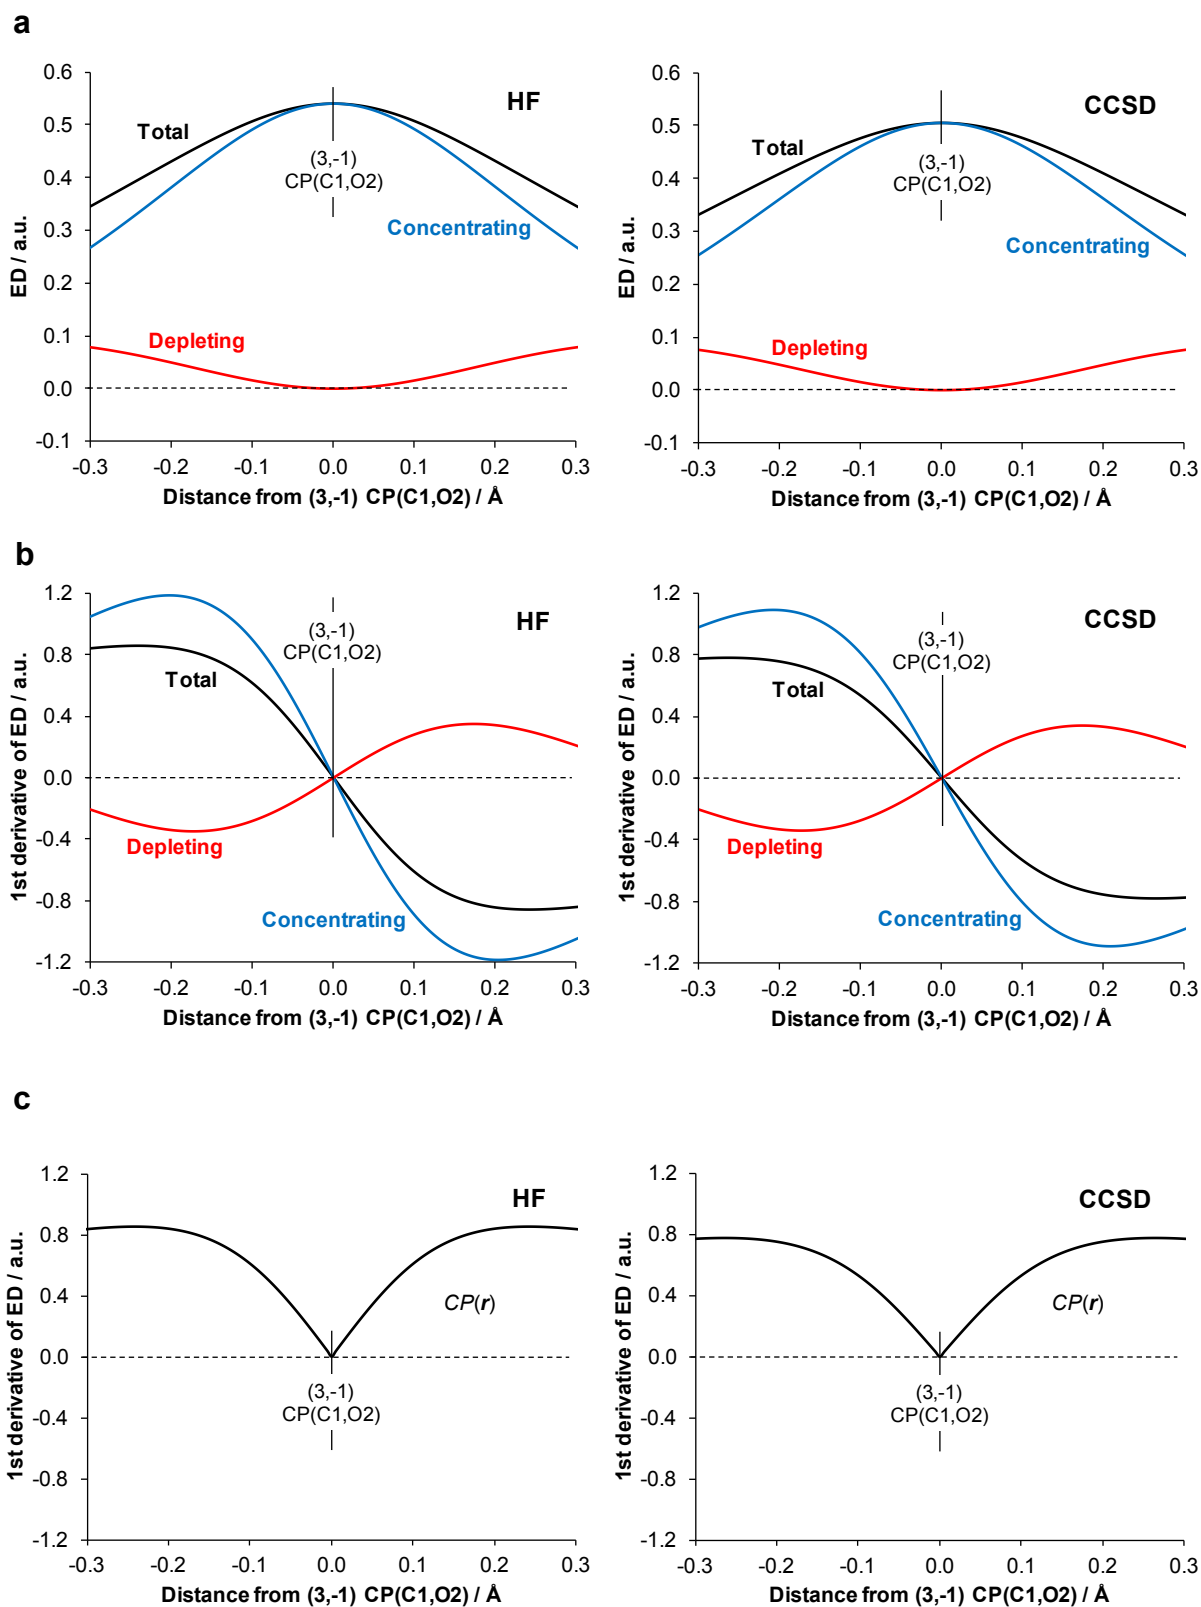

**Figure 4.3.** 1D-cross-sections along  $\lambda_2$ -eigenvector of MOs (HF) and NOs (CCSD) of CO with all concentrating or depleting orbitals grouped separately. a) Total density contribution, b) directional partial 1<sup>st</sup> derivative and c)  $CP(\mathbf{r})$  function.

## Part 4

### Data pertaining to the N<sub>2</sub> molecule

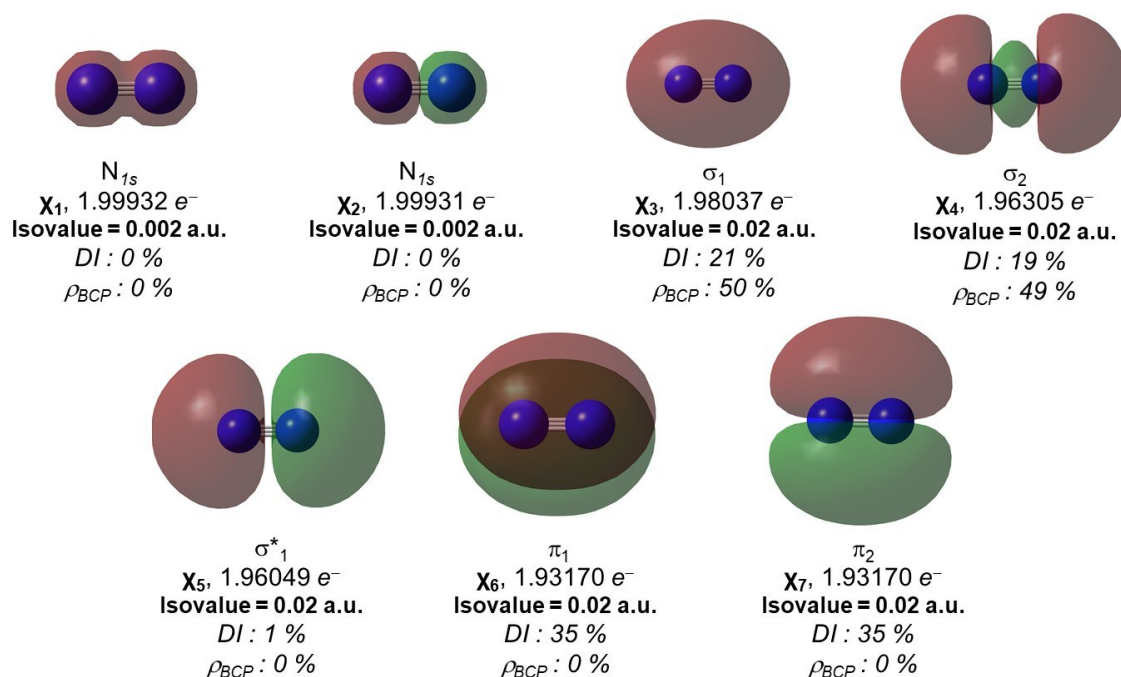

**Figure 5.1.** 3D-isosurfaces of selected NOs of N<sub>2</sub> at the CCSD/6-311++g(2df,2pd) level. Percentage contributions to the  $DI(N,N)$  as well as to the electron density at the (3,-1) CP(N,N) are also shown.

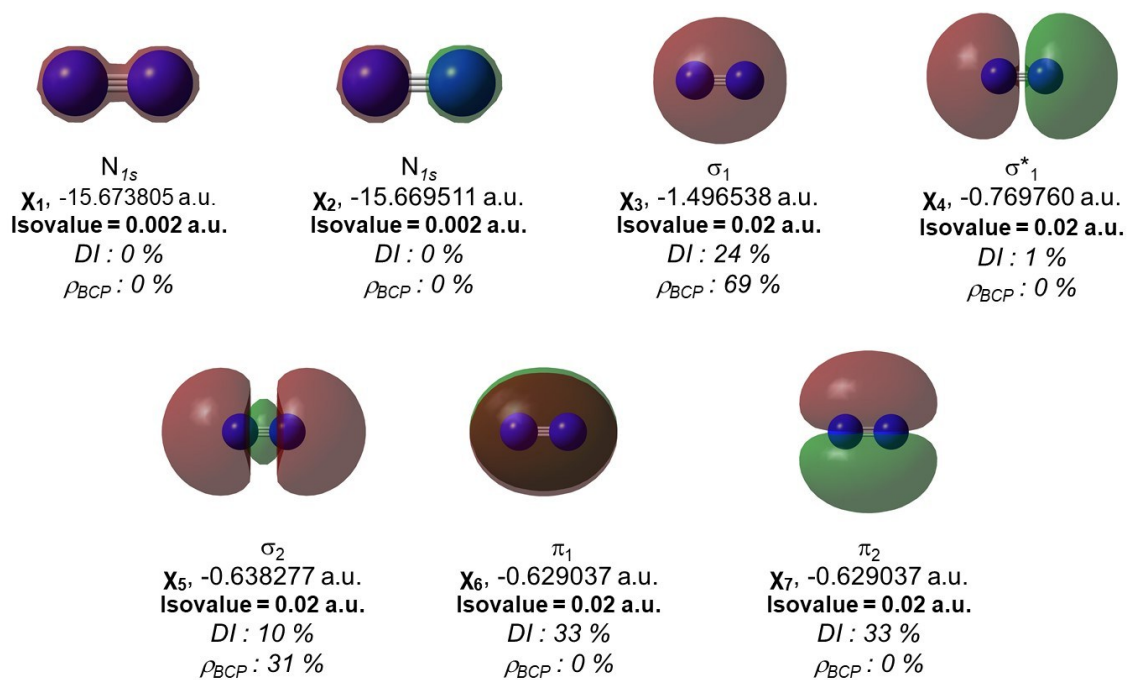

**Figure 5.2.** 3D-isosurfaces of MOs of N<sub>2</sub> at the HF/6-311++g(2df,2pd) level. Percentage contributions to the  $DI(N,N)$  as well as to the electron density at the (3,-1) CP(N,N) are also shown.

**Table 5.1.** Molecular orbital contributions and their classifications in terms of bonding in N<sub>2</sub> at the CCSD (Part a) and HF (Part b) levels.

Part a. Data at the CCSD level

| Orbital                         | Electron population (N) / e <sup>-</sup> |          | Orthodox        |                                         | At (3,-1) Critical point {N1,N2} |          |                                                                           | Delocalisation index                |          |                                                      |
|---------------------------------|------------------------------------------|----------|-----------------|-----------------------------------------|----------------------------------|----------|---------------------------------------------------------------------------|-------------------------------------|----------|------------------------------------------------------|
|                                 |                                          |          | Label           | Classification based on AO interference | ED contribution / ρ              |          | Classification based on 2 <sup>nd</sup> derivative sign (λ <sub>2</sub> ) | Contribution / e <sup>-</sup> pairs |          | Classification based on MO interference <sup>a</sup> |
| χ <sub>1</sub>                  | 1.99932                                  | (14.3%)  | N <sub>1s</sub> | nonbonding                              | 0.00063                          | (0.1%)   | concentrating                                                             | 0.00003                             | (0.0%)   | constructive                                         |
| χ <sub>2</sub>                  | 1.99931                                  | (14.3%)  | N <sub>1s</sub> | nonbonding                              | 0.00000                          | (0.0%)   | non-contributing                                                          | 0.00003                             | (0.0%)   | constructive                                         |
| χ <sub>3</sub>                  | 1.98037                                  | (14.1%)  | σ <sub>1</sub>  | bonding                                 | 0.35660                          | (50.3%)  | concentrating                                                             | 0.48802                             | (21.0%)  | constructive                                         |
| χ <sub>4</sub>                  | 1.96305                                  | (14.0%)  | σ <sub>2</sub>  | bonding                                 | 0.34861                          | (49.2%)  | concentrating                                                             | 0.44842                             | (19.3%)  | constructive                                         |
| χ <sub>5</sub>                  | 1.96049                                  | (14.0%)  | σ* <sub>1</sub> | antibonding                             | 0.00000                          | (0.0%)   | non-contributing                                                          | 0.01853                             | (0.8%)   | constructive                                         |
| χ <sub>6</sub>                  | 1.93170                                  | (13.8%)  | π <sub>1</sub>  | bonding                                 | 0.00000                          | (0.0%)   | depleting <sup>b</sup>                                                    | 0.82419                             | (35.5%)  | constructive                                         |
| χ <sub>7</sub>                  | 1.93170                                  | (13.8%)  | π <sub>2</sub>  | bonding                                 | 0.00000                          | (0.0%)   | depleting                                                                 | 0.82419                             | (35.5%)  | constructive                                         |
| χ <sub>8</sub> –χ <sub>68</sub> | 0.23406                                  | (1.7%)   | –               | –                                       | 0.00334                          | (0.5%)   | –                                                                         | -0.28128                            | (-12.1%) | destructive                                          |
| Total                           | 14.00000                                 | (100.0%) | –               | bond order = 3                          | 0.70917                          | (100.0%) | DB {N1,N2} present                                                        | 2.32213                             | (100.0%) | –                                                    |

Part b. Data at the HF level.

| Orbital        | Hartree Fock energy / a.u. |  | Orthodox        |                                         | At (3,-1) Critical point {N1,N2} |          |                                                                           | Delocalisation index                |          |                                                      |
|----------------|----------------------------|--|-----------------|-----------------------------------------|----------------------------------|----------|---------------------------------------------------------------------------|-------------------------------------|----------|------------------------------------------------------|
|                |                            |  | Label           | Classification based on AO interference | ED contribution / ρ              |          | Classification based on 2 <sup>nd</sup> derivative sign (λ <sub>2</sub> ) | Contribution / e <sup>-</sup> pairs |          | Classification based on MO interference <sup>a</sup> |
| χ <sub>1</sub> | -15.673805                 |  | N <sub>1s</sub> | nonbonding                              | 0.00120                          | (0.2%)   | concentrating                                                             | 0.00008                             | (0.0%)   | constructive                                         |
| χ <sub>2</sub> | -15.669511                 |  | N <sub>1s</sub> | nonbonding                              | 0.00000                          | (0.0%)   | non-contributing                                                          | 0.00004                             | (0.0%)   | constructive                                         |
| χ <sub>3</sub> | -1.496538                  |  | σ <sub>1</sub>  | bonding                                 | 0.53511                          | (69.1%)  | concentrating                                                             | 0.72884                             | (24.0%)  | constructive                                         |
| χ <sub>4</sub> | -0.769760                  |  | σ* <sub>1</sub> | antibonding                             | 0.00000                          | (0.0%)   | non-contributing                                                          | 0.02134                             | (0.7%)   | constructive                                         |
| χ <sub>5</sub> | -0.638277                  |  | σ <sub>2</sub>  | bonding                                 | 0.23812                          | (30.7%)  | concentrating                                                             | 0.29245                             | (9.6%)   | constructive                                         |
| χ <sub>6</sub> | -0.629037                  |  | π <sub>1</sub>  | bonding                                 | 0.00000                          | (0.0%)   | depleting <sup>b</sup>                                                    | 1.00000                             | (32.9%)  | constructive                                         |
| χ <sub>7</sub> | -0.629037                  |  | π <sub>2</sub>  | bonding                                 | 0.00000                          | (0.0%)   | depleting                                                                 | 1.00000                             | (32.9%)  | constructive                                         |
| Total          | –                          |  | –               | bond order = 3                          | 0.77443                          | (100.0%) | DB {N1,N2} present                                                        | 2.32213                             | (100.0%) | –                                                    |

<sup>a</sup> positive value = constructive interference, negative value = destructive interference<sup>b</sup> non-contributing orbital χ<sub>6</sub> is degenerate with orbital χ<sub>7</sub>, depleting along λ<sub>1</sub>

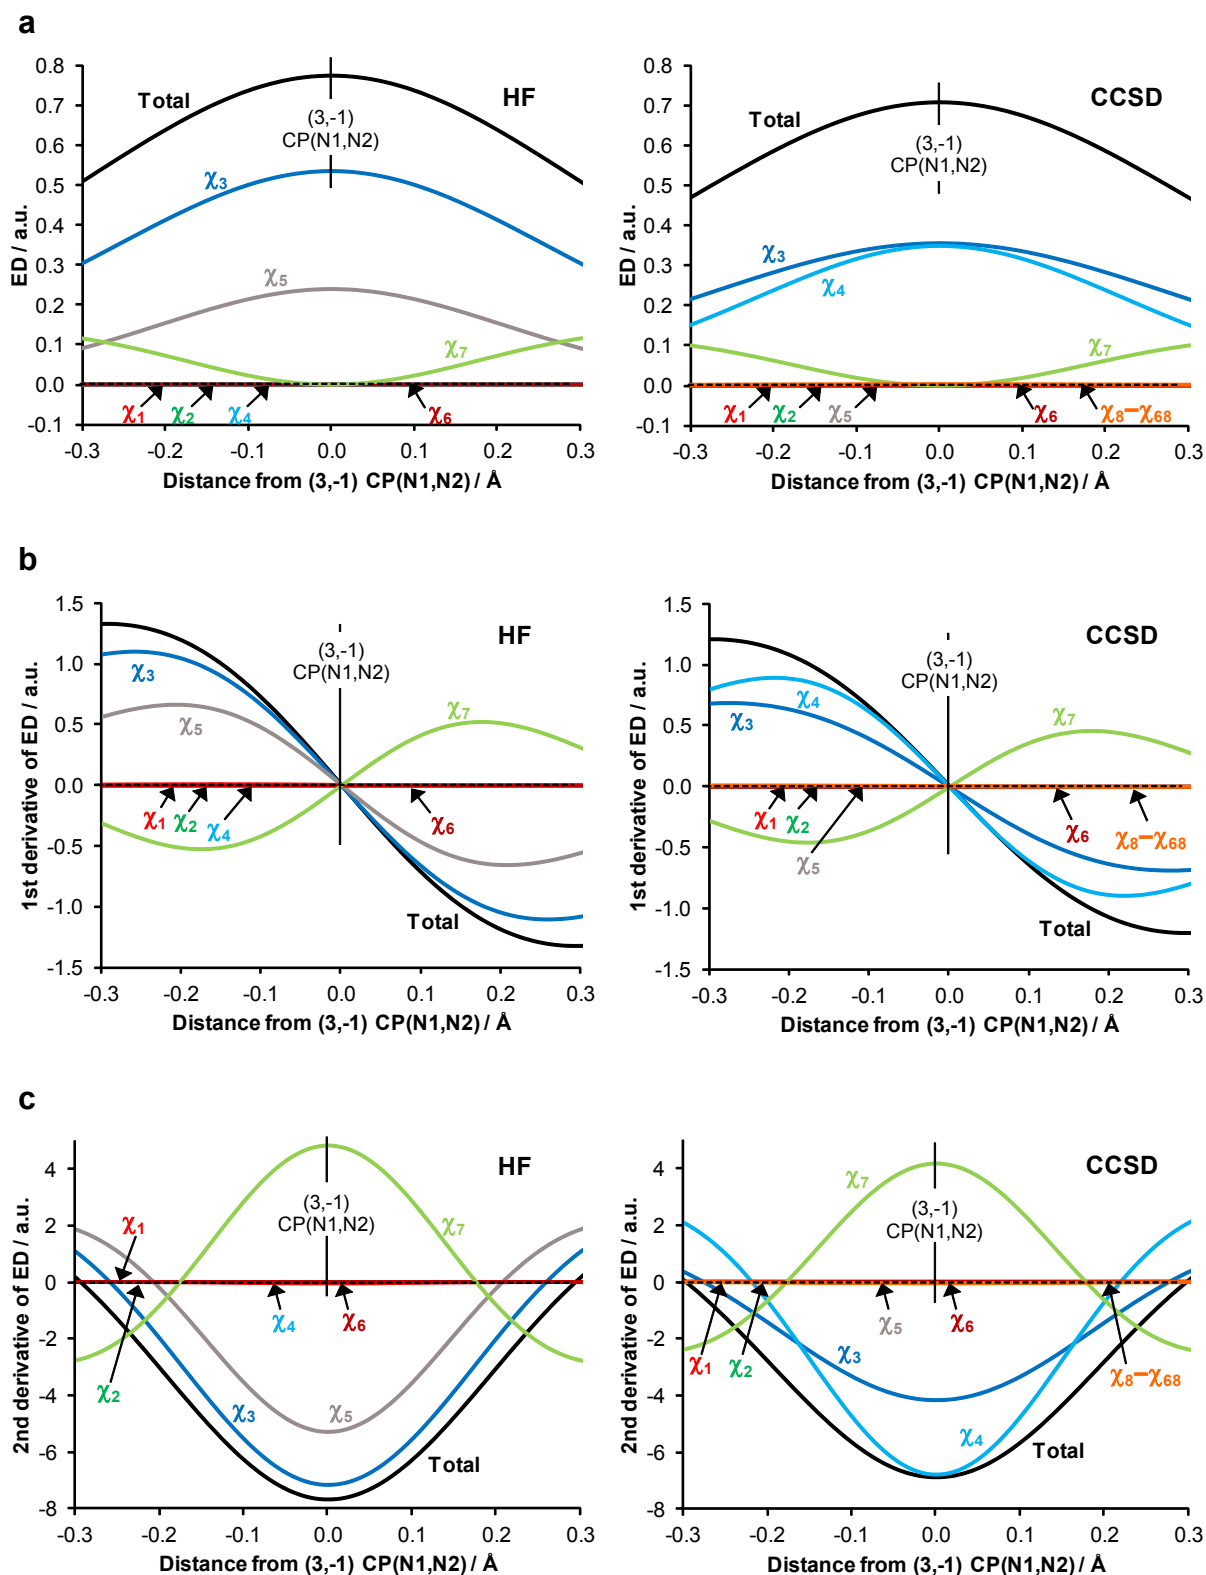

**Figure 5.3.** 1D-cross-sections along  $\lambda_2$ -eigenvector of MOs (HF) and NOs (CCSD) of  $N_2$ . a) Total density contribution, b) directional partial 1<sup>st</sup> derivative and c) directional partial 2<sup>nd</sup> derivative.

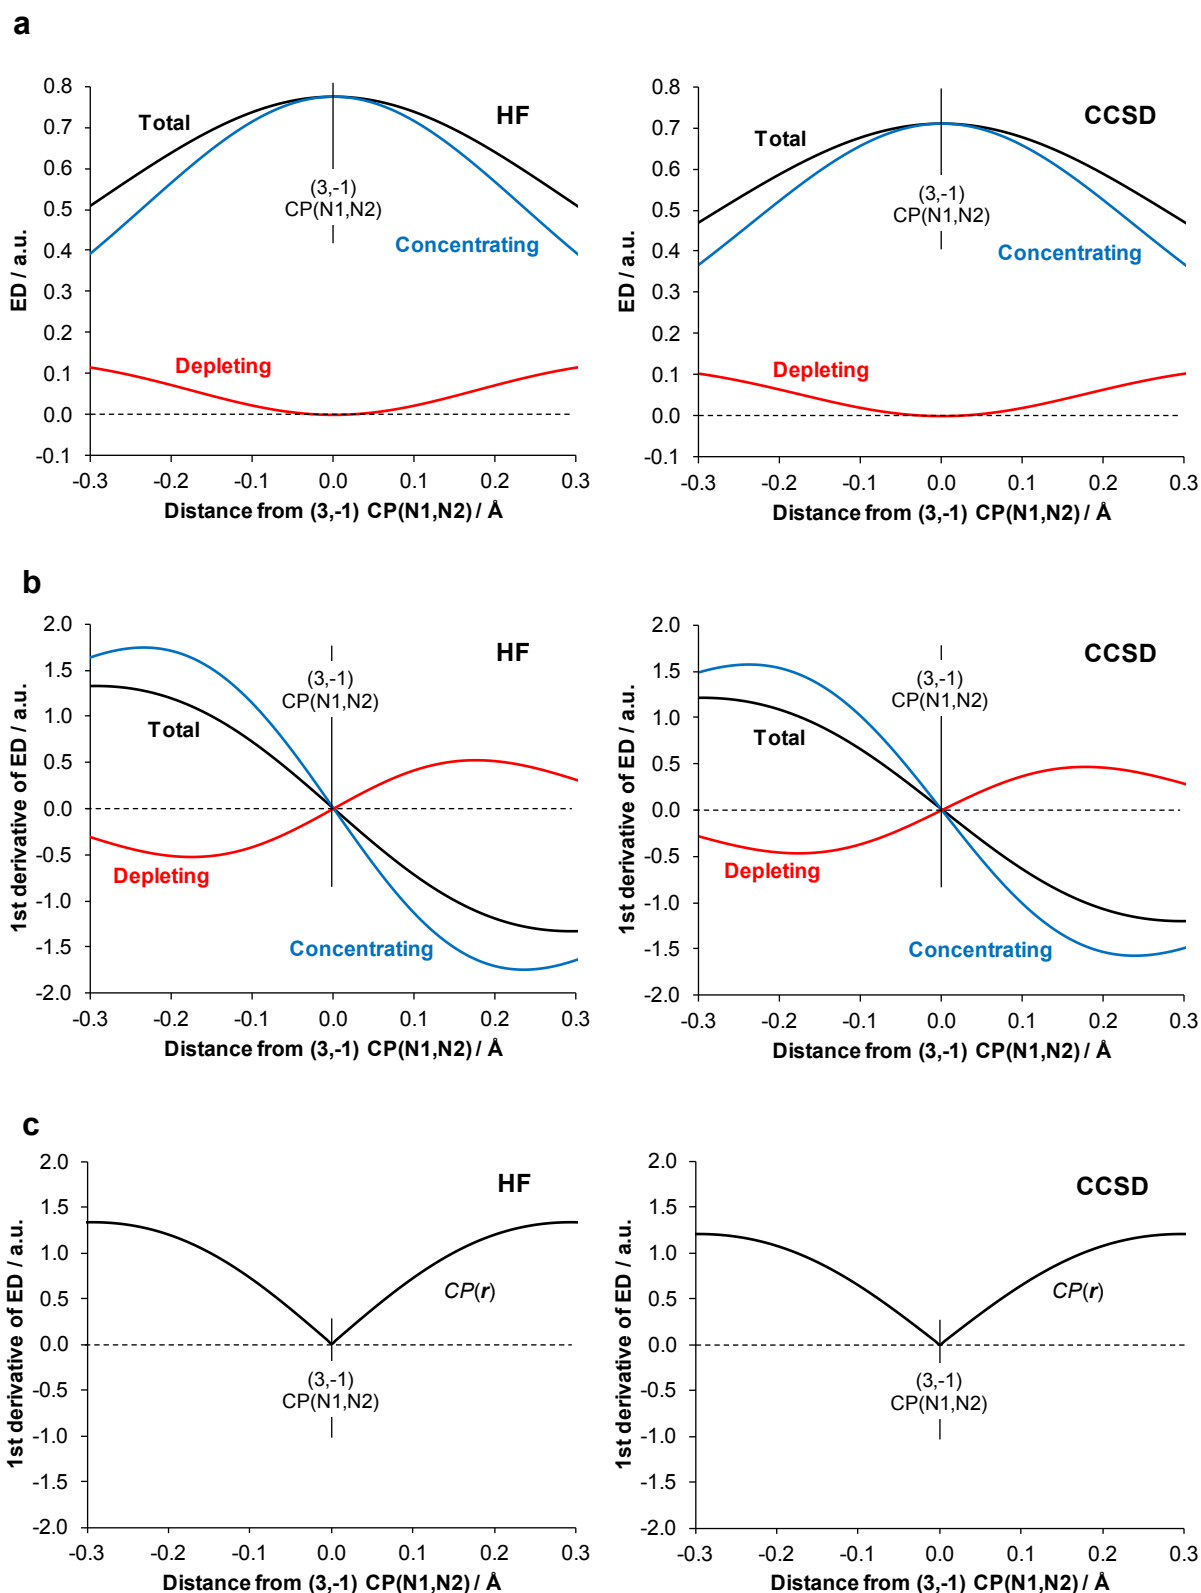

**Figure 5.4.** 1D-cross-sections along  $\lambda_2$ -eigenvector of MOs (HF) and NOs (CCSD) of  $N_2$  with all concentrating or depleting orbitals grouped separately. a) Total density contribution, b) directional partial 1<sup>st</sup> derivative and c)  $CP(r)$  function.



## Part 5

### Data pertaining to the H<sub>2</sub> molecule

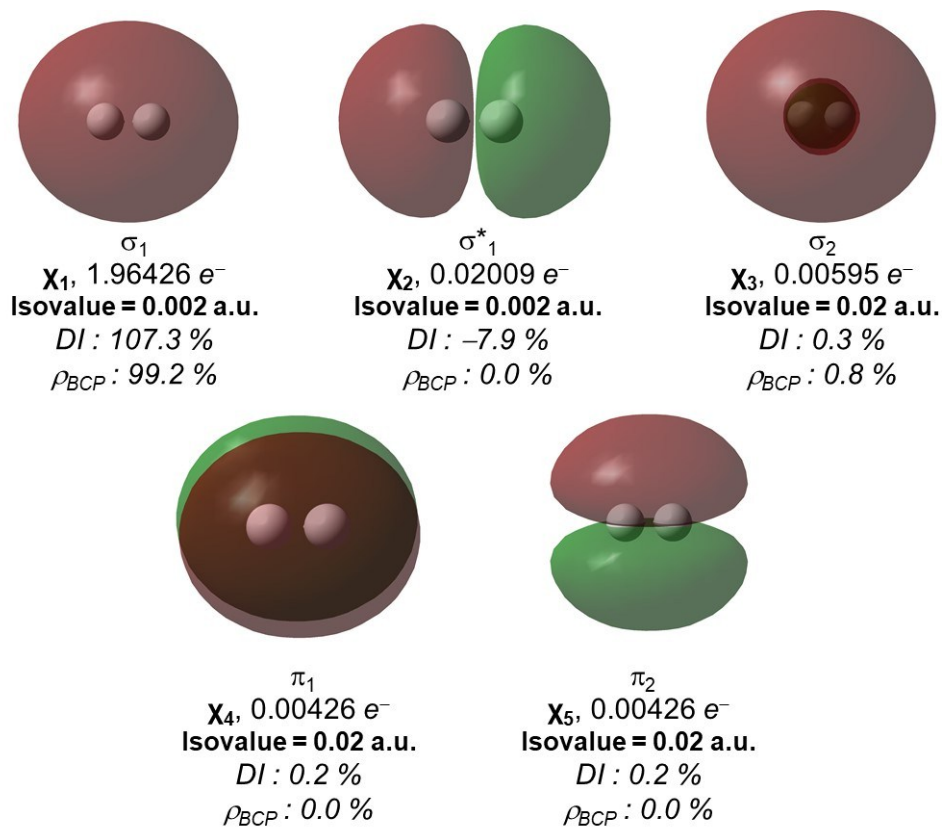

**Figure 6.1.** 3D-isosurfaces of selected NOs in H<sub>2</sub> at the CCSD/6-311++G(2df,2pd) level. Percentage contributions to the  $DI(H,H)$  as well as to the electron density at the (3,-1) CP(H,H) are also shown.

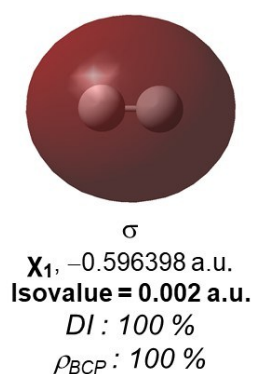

**Figure 6.2.** 3D-isosurface of the occupied MO in H<sub>2</sub> at the HF/6-311++G(2df,2pd) level. Percentage contributions to the  $DI(H,H)$  as well as to the electron density at the (3,-1) CP(H,H) are also shown.

**Table 6.1.** Molecular orbital contributions and their classifications in terms of bonding in CO at the CCSD and HF levels.

| Orbital                | Electron population<br>( $N$ ) / $e^-$ |          | Hartree<br>Fock<br>energy / a.u. | Orthodox |                                            | At (3,-1) Critical point {H1,H2} |                                                                            | Delocalisation index          |                                                         |
|------------------------|----------------------------------------|----------|----------------------------------|----------|--------------------------------------------|----------------------------------|----------------------------------------------------------------------------|-------------------------------|---------------------------------------------------------|
|                        |                                        |          |                                  | Label    | Classification based<br>on AO interference | ED contribution<br>/ $\rho$      | Classification based on<br>2 <sup>nd</sup> derivative sign ( $\lambda_2$ ) | Contribution<br>/ $e^-$ pairs | Classification based<br>on MO interference <sup>a</sup> |
| $\chi_1$               | 1.96426                                | (98.2%)  | -0.60                            | $H_{1s}$ | bonding                                    | 0.26636 (99.2%)                  | concentrating                                                              | 0.90555 (107.3%)              | constructive                                            |
| $\chi_2$ - $\chi_{30}$ | 0.03574                                | (1.8%)   | –                                | –        | –                                          | 0.00211 (0.8%)                   | –                                                                          | -0.06125 (-7.3%)              | destructive                                             |
| Total                  | 2.00000                                | (100.0%) | –                                | –        | bond order = 1                             | 0.26847 (100.0%)                 | DB {H1,H2} present                                                         | 0.84430 (100.0%)              | –                                                       |

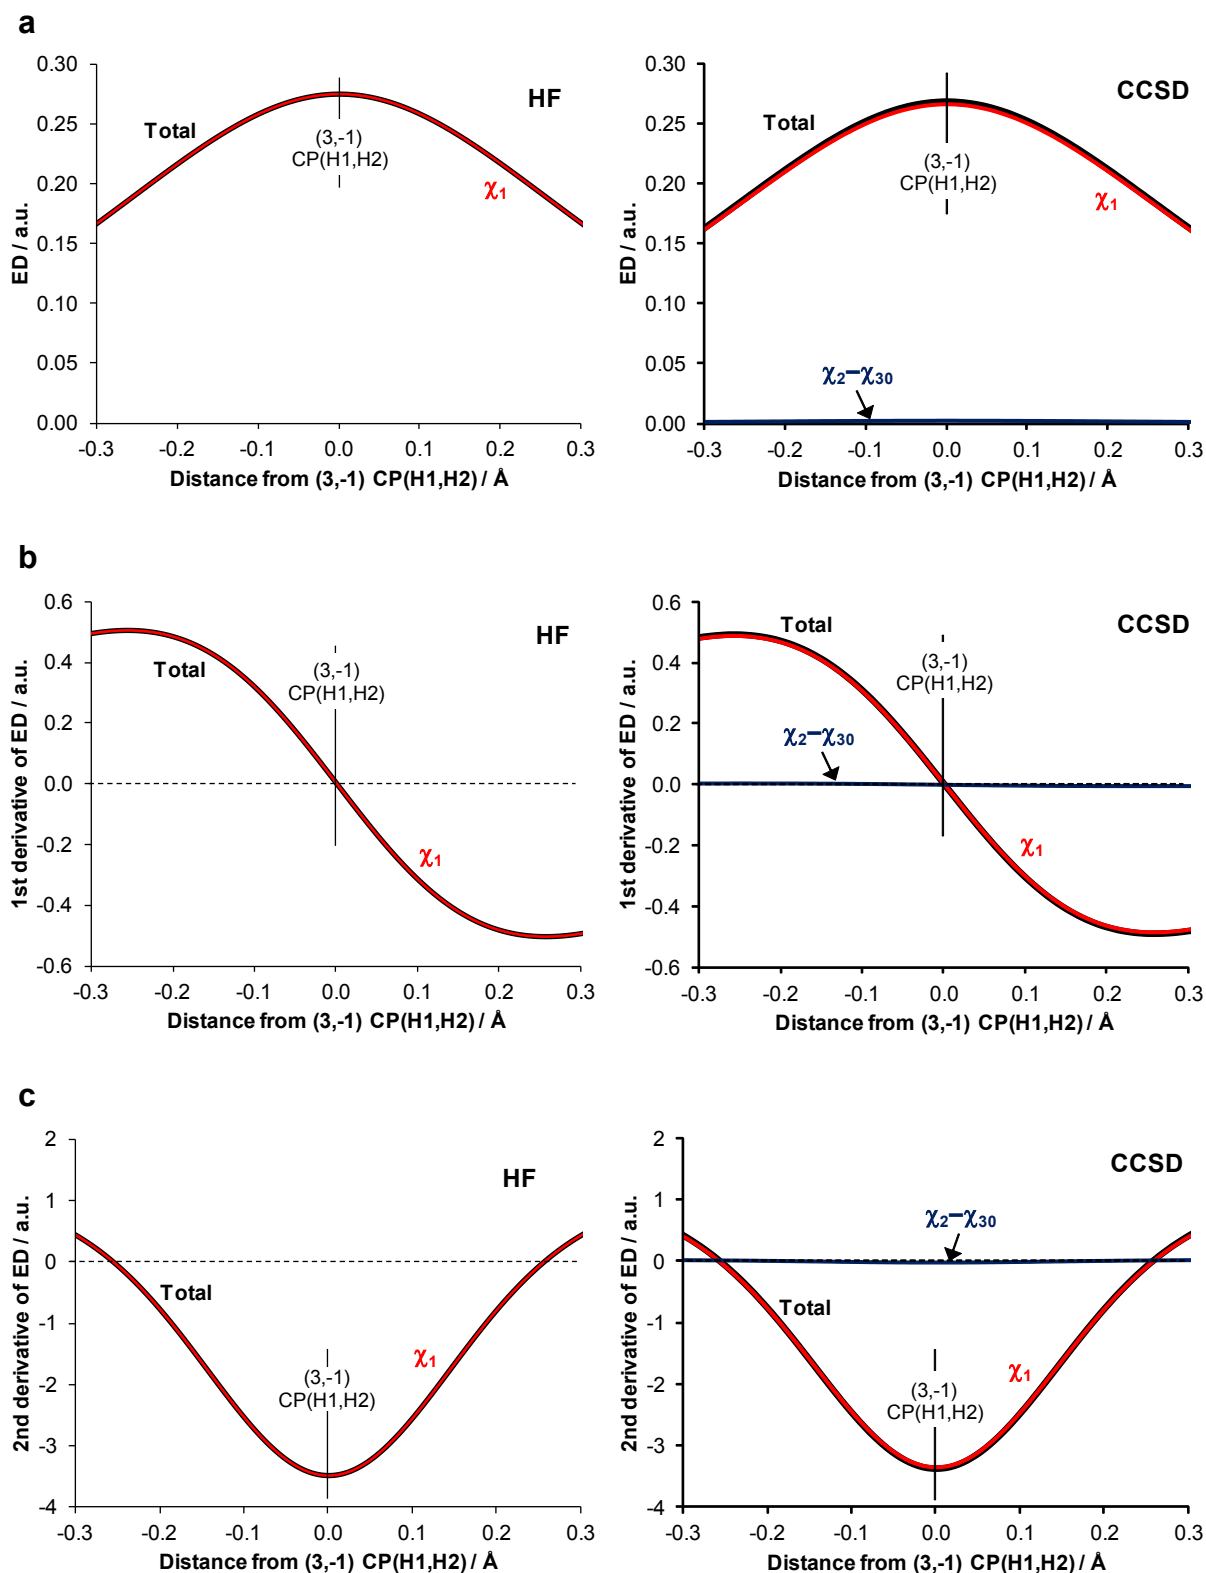

**Figure 6.3.** 1D-cross-sections along  $\lambda_2$ -eigenvector of MOs (HF) and NOs (CCSD) of  $H_2$ . a) Total density contribution, b) directional partial 1<sup>st</sup> derivative and c) directional partial 2<sup>nd</sup> derivative.

## Part 6

### Data pertaining to the Cr<sub>2</sub> molecule

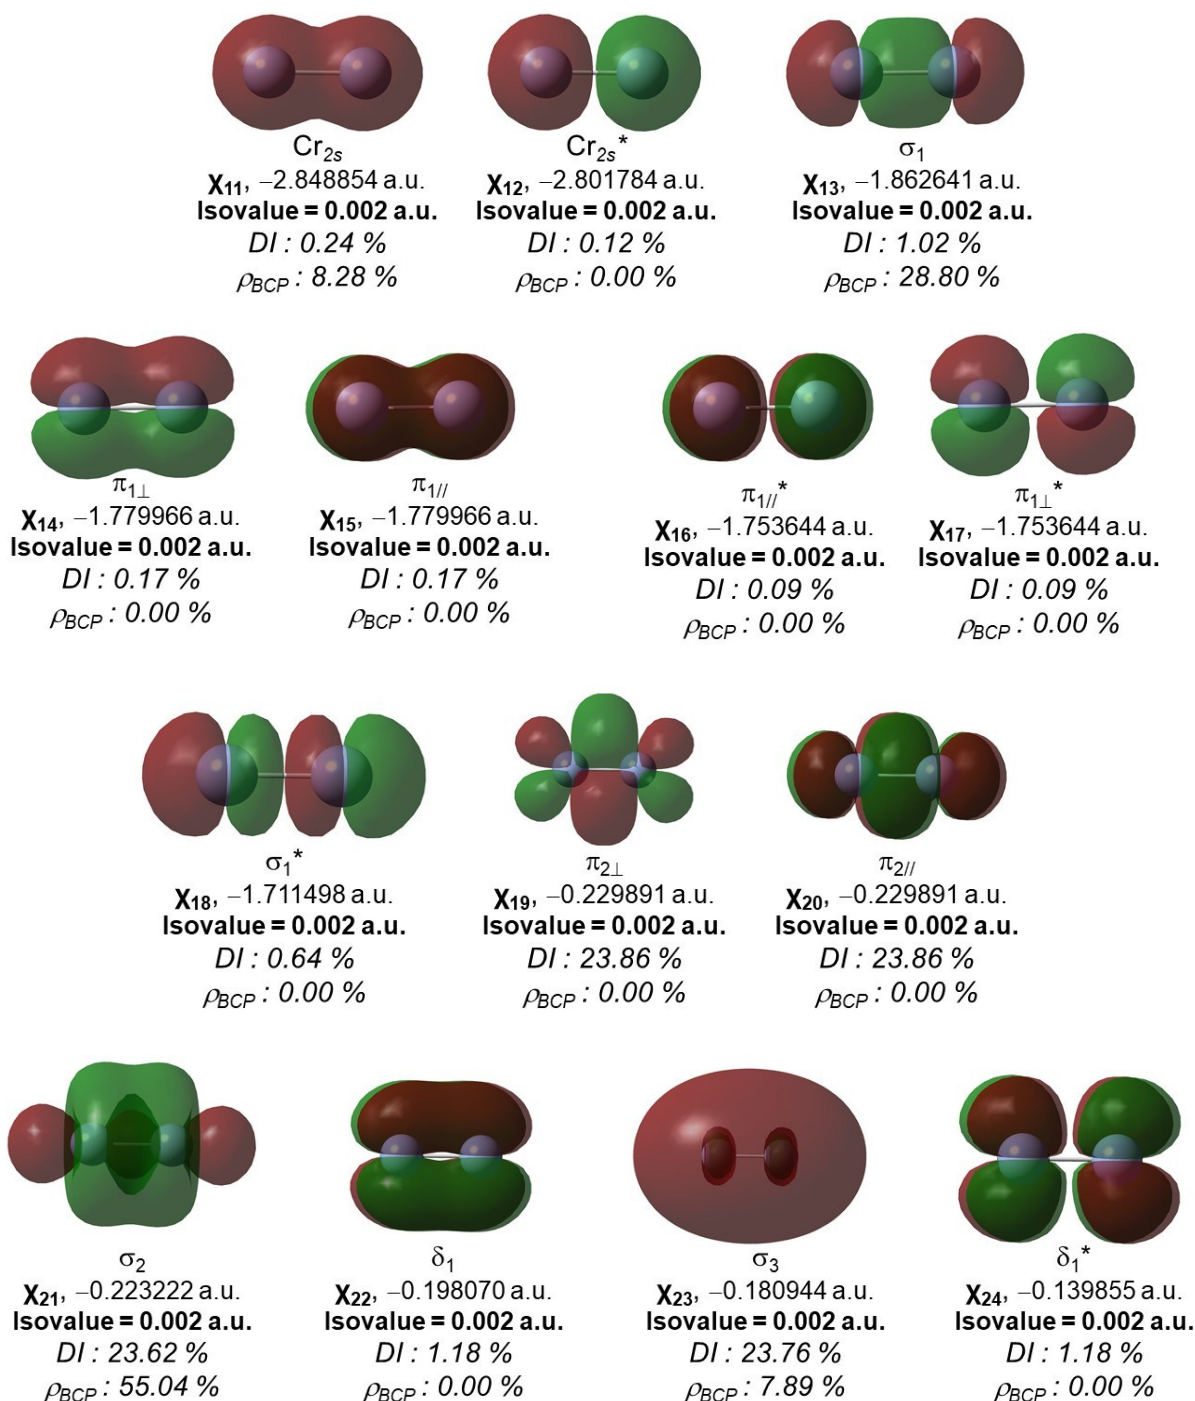

**Figure 7.1.** 3D-isosurfaces of selected MOs in Cr<sub>2</sub> at the B3LYP/6-311++G(2df,2pd) level. Percentage contributions to the  $DI(\text{Cr},\text{Cr})$  as well as to the electron density at the (3,-1) CP(Cr,Cr) are also shown.

**Table 7.1.** Molecular orbital contributions and their classifications in terms of bonding in in Cr<sub>2</sub> at the B3LYP/6-311++G(2df,2pd) level.

| Orbital              | B3LYP<br>energy / a.u. | Orthodox           |                                            | At (3,-1) Critical point {Cr1,Cr2} |                                                                            |                                        | Delocalisation index                                    |          |                  |
|----------------------|------------------------|--------------------|--------------------------------------------|------------------------------------|----------------------------------------------------------------------------|----------------------------------------|---------------------------------------------------------|----------|------------------|
|                      |                        | Label              | Classification based<br>on AO interference | ED contribution<br>/ $\rho$        | Classification based on<br>2 <sup>nd</sup> derivative sign ( $\lambda_2$ ) | Contribution<br>/ e <sup>-</sup> pairs | Classification based<br>on MO interference <sup>a</sup> |          |                  |
| $\chi_1 - \chi_{10}$ |                        | Core               | nonbonding                                 | 0.00000                            | (0.0%)                                                                     | non-contributing                       | 0.00000                                                 | (0.0%)   | non-contributing |
| $\chi_{11}$          | -2.848855              | Cr <sub>2s</sub>   | bonding                                    | 0.02052                            | (8.3%)                                                                     | concentrating                          | 0.01017                                                 | (0.2%)   | constructive     |
| $\chi_{12}$          | -2.801784              | Cr <sub>2s</sub> * | antibonding                                | 0.00000                            | (0.0%)                                                                     | non-contributing                       | 0.00495                                                 | (0.1%)   | constructive     |
| $\chi_{13}$          | -1.862641              | $\sigma_I$         | bonding                                    | 0.07138                            | (28.8%)                                                                    | concentrating                          | 0.04256                                                 | (1.0%)   | constructive     |
| $\chi_{14}$          | -1.779966              | $\pi_{I\perp}$     | bonding                                    | 0.00000                            | (0.0%)                                                                     | depleting                              | 0.00719                                                 | (0.2%)   | constructive     |
| $\chi_{15}$          | -1.779966              | $\pi_{I//}$        | bonding                                    | 0.00000                            | (0.0%)                                                                     | non-contributing                       | 0.00719                                                 | (0.2%)   | constructive     |
| $\chi_{16}$          | -1.753644              | $\pi_{I//}^*$      | antibonding                                | 0.00000                            | (0.0%)                                                                     | non-contributing                       | 0.00370                                                 | (0.1%)   | constructive     |
| $\chi_{17}$          | -1.753644              | $\pi_{I\perp}^*$   | antibonding                                | 0.00000                            | (0.0%)                                                                     | non-contributing                       | 0.00370                                                 | (0.1%)   | constructive     |
| $\chi_{18}$          | -1.711498              | $\sigma_I^*$       | antibonding                                | 0.00000                            | (0.0%)                                                                     | non-contributing                       | 0.02680                                                 | (0.6%)   | constructive     |
| $\chi_{19}$          | -0.229891              | $\pi_{2\perp}$     | bonding                                    | 0.00000                            | (0.0%)                                                                     | depleting                              | 0.99650                                                 | (23.9%)  | constructive     |
| $\chi_{20}$          | -0.229891              | $\pi_{2//}$        | bonding                                    | 0.00000                            | (0.0%)                                                                     | non-contributing                       | 0.99650                                                 | (23.9%)  | constructive     |
| $\chi_{21}$          | -0.223222              | $\sigma_2$         | bonding                                    | 0.13643                            | (55.0%)                                                                    | concentrating                          | 0.98669                                                 | (23.6%)  | constructive     |
| $\chi_{22}$          | -0.198070              | $\delta_I$         | bonding                                    | 0.00000                            | (0.0%)                                                                     | non-contributing                       | 0.04913                                                 | (1.2%)   | constructive     |
| $\chi_{23}$          | -0.180944              | $\sigma_3$         | bonding                                    | 0.01955                            | (7.9%)                                                                     | concentrating                          | 0.99231                                                 | (23.8%)  | constructive     |
| $\chi_{24}$          | -0.139855              | $\delta_I^*$       | antibonding                                | 0.00000                            | (0.0%)                                                                     | non-contributing                       | 0.04913                                                 | (1.2%)   | constructive     |
| Total                | –                      | –                  | bond order ~ 4                             | 0.24787                            | (100.0%)                                                                   | DB {Cr1,Cr2} present                   | 4.17653                                                 | (100.0%) | –                |

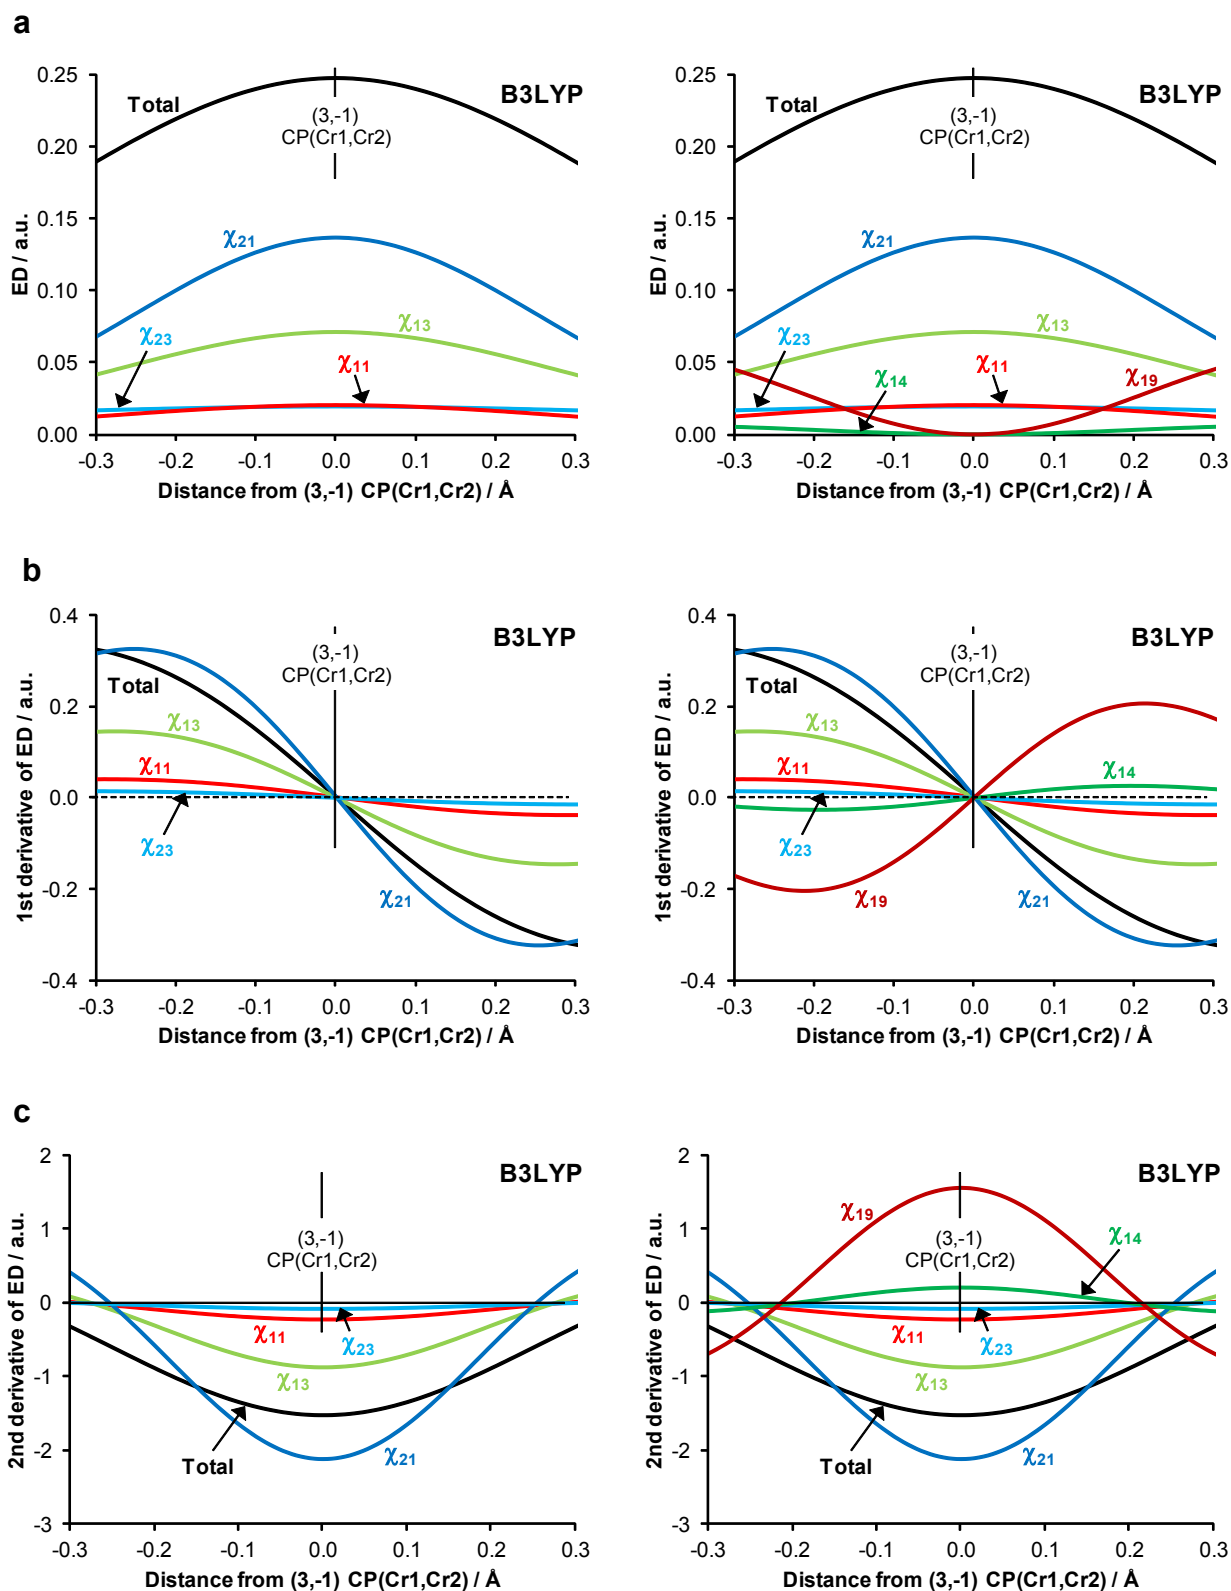

**Figure 7.2.** 1D-cross-sections along  $\lambda_2$ -eigenvector of  $\sigma$ -bonding MOs as well as highest-contributing MOs of  $\text{Cr}_2$  at the B3LYP/6-311++G(2df,2pd) level. a) Total density contribution, b) directional partial 1<sup>st</sup> derivative and c) directional partial 2<sup>nd</sup> derivative.

## Part 7

### Data pertaining to the LiH dimer

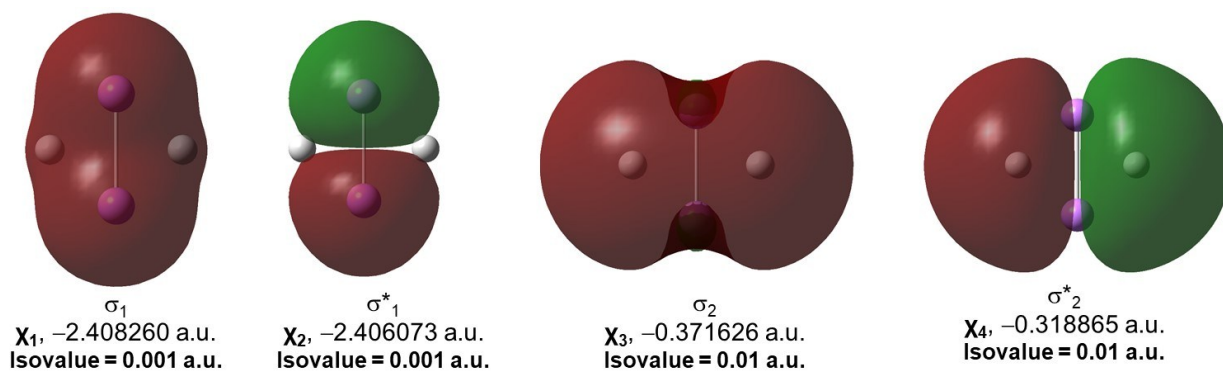

**Figure 7.1.** 3D-isosurfaces of MOs of Li<sub>2</sub>H<sub>2</sub> at the HF/6-311++G(2df,2pd) level.

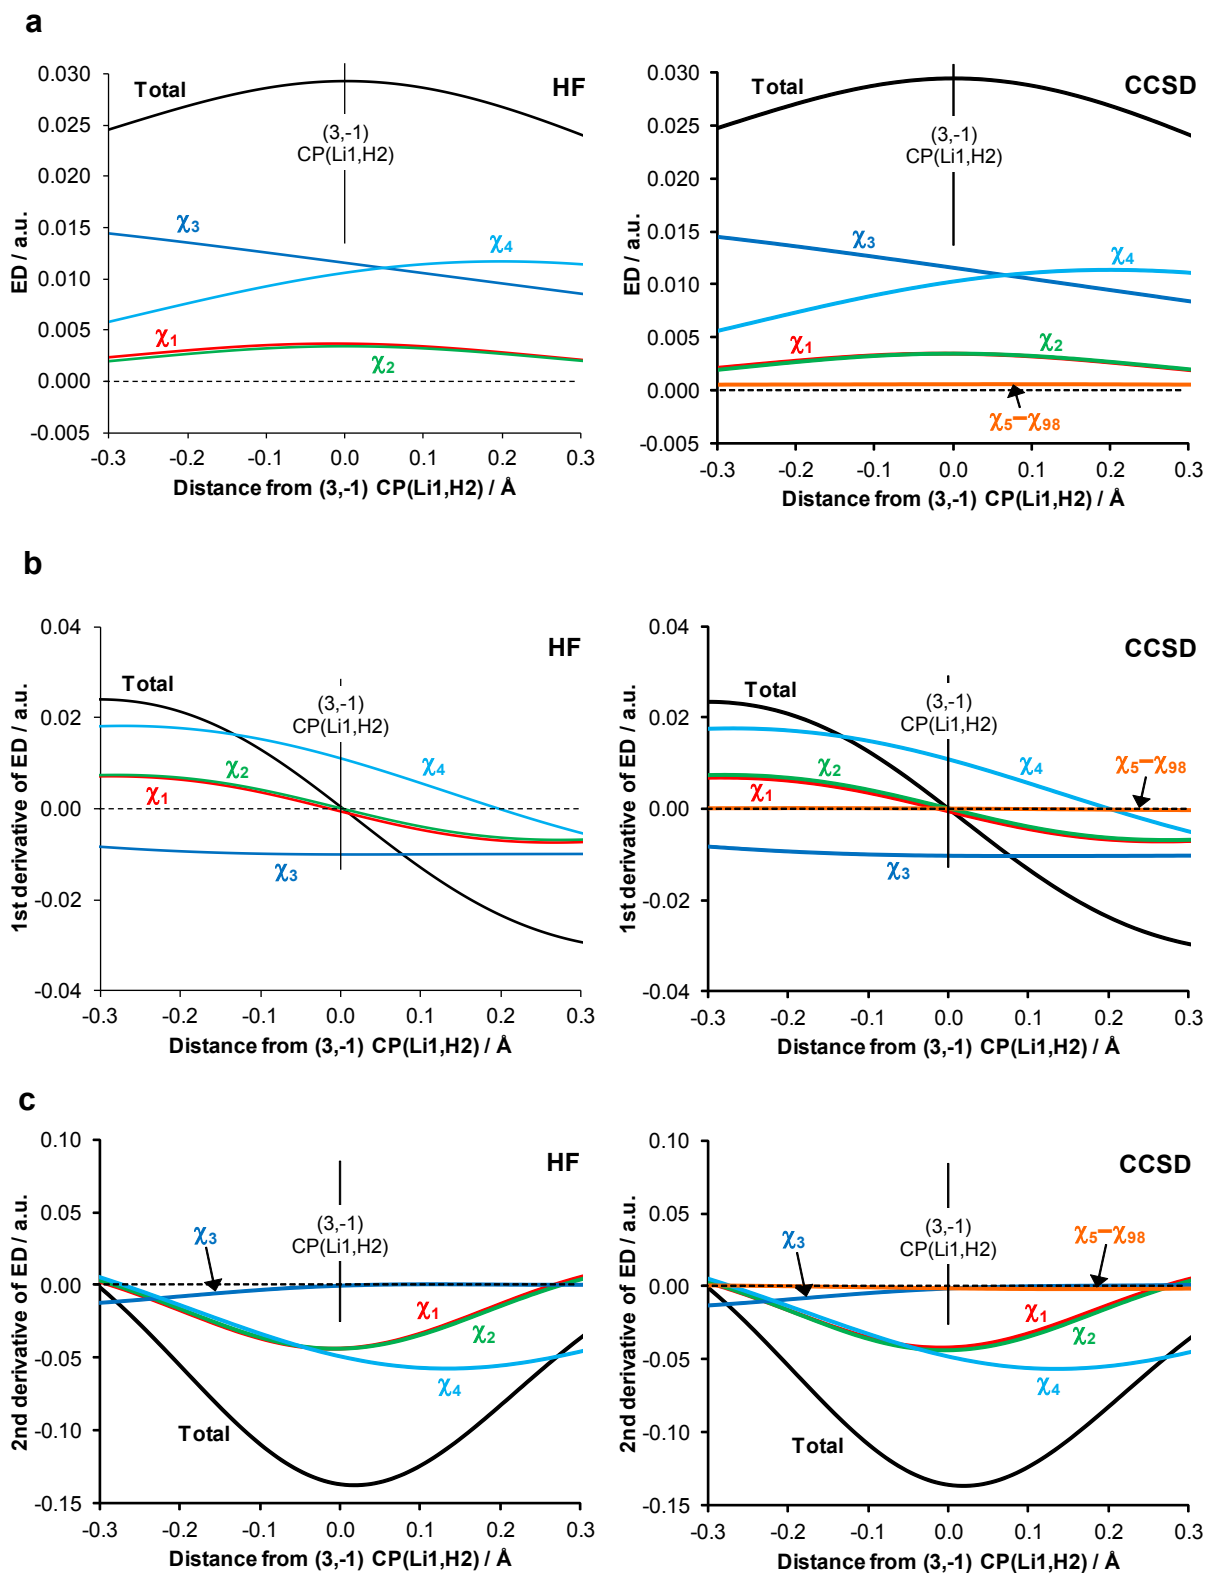

**Figure 7.2.** 1D-cross-sections along  $v_{\text{Li1}\perp\text{H2}}$  of MOs (HF) and NOs (CCSD) of the  $\text{Li}_2\text{H}_2$  molecule. a) Total density contribution, b) directional partial 1<sup>st</sup> derivative and c) directional partial 2<sup>nd</sup> derivative.



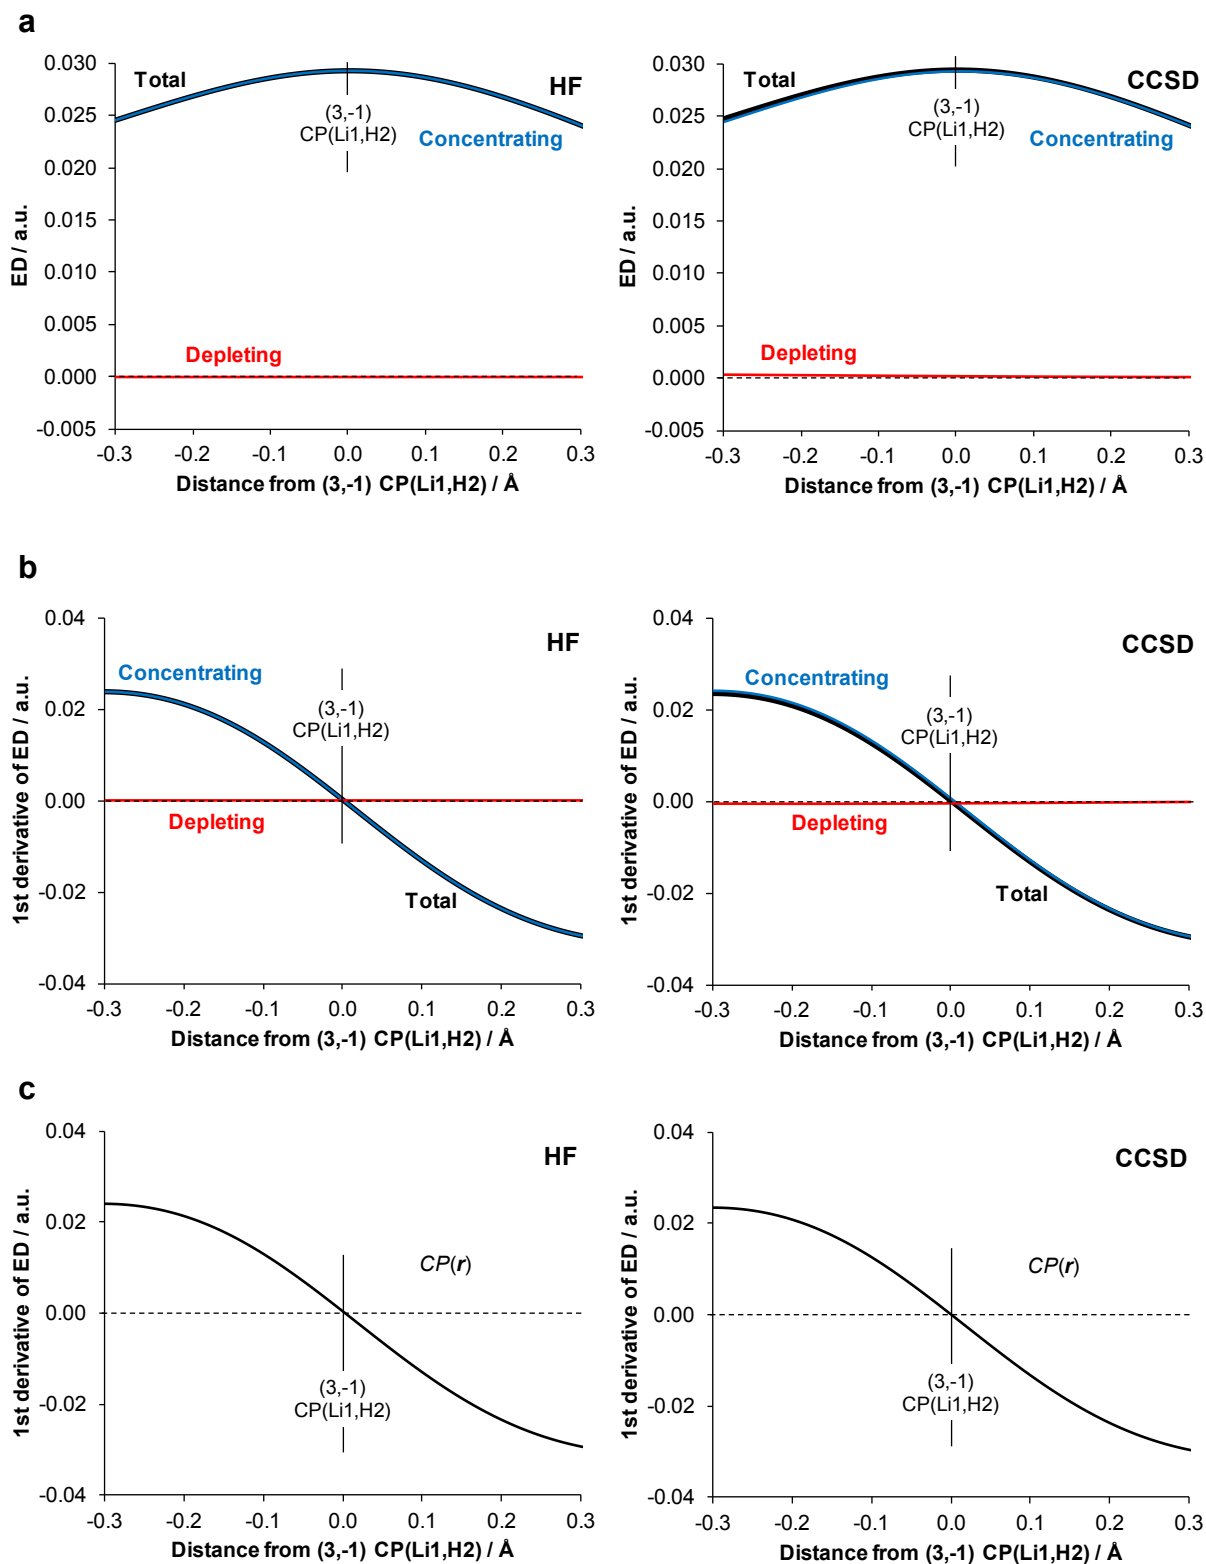

**Figure 7.3.** 1D-cross-sections along  $v_{\text{Li1}\perp\text{H2}}$  of MOs (HF) and NOs (CCSD) of the  $\text{Li}_2\text{H}_2$  molecule with all concentrating or depleting orbitals grouped separately. a) Total density contribution, b) directional partial 1<sup>st</sup> derivative and c)  $CP(\mathbf{r})$  function.

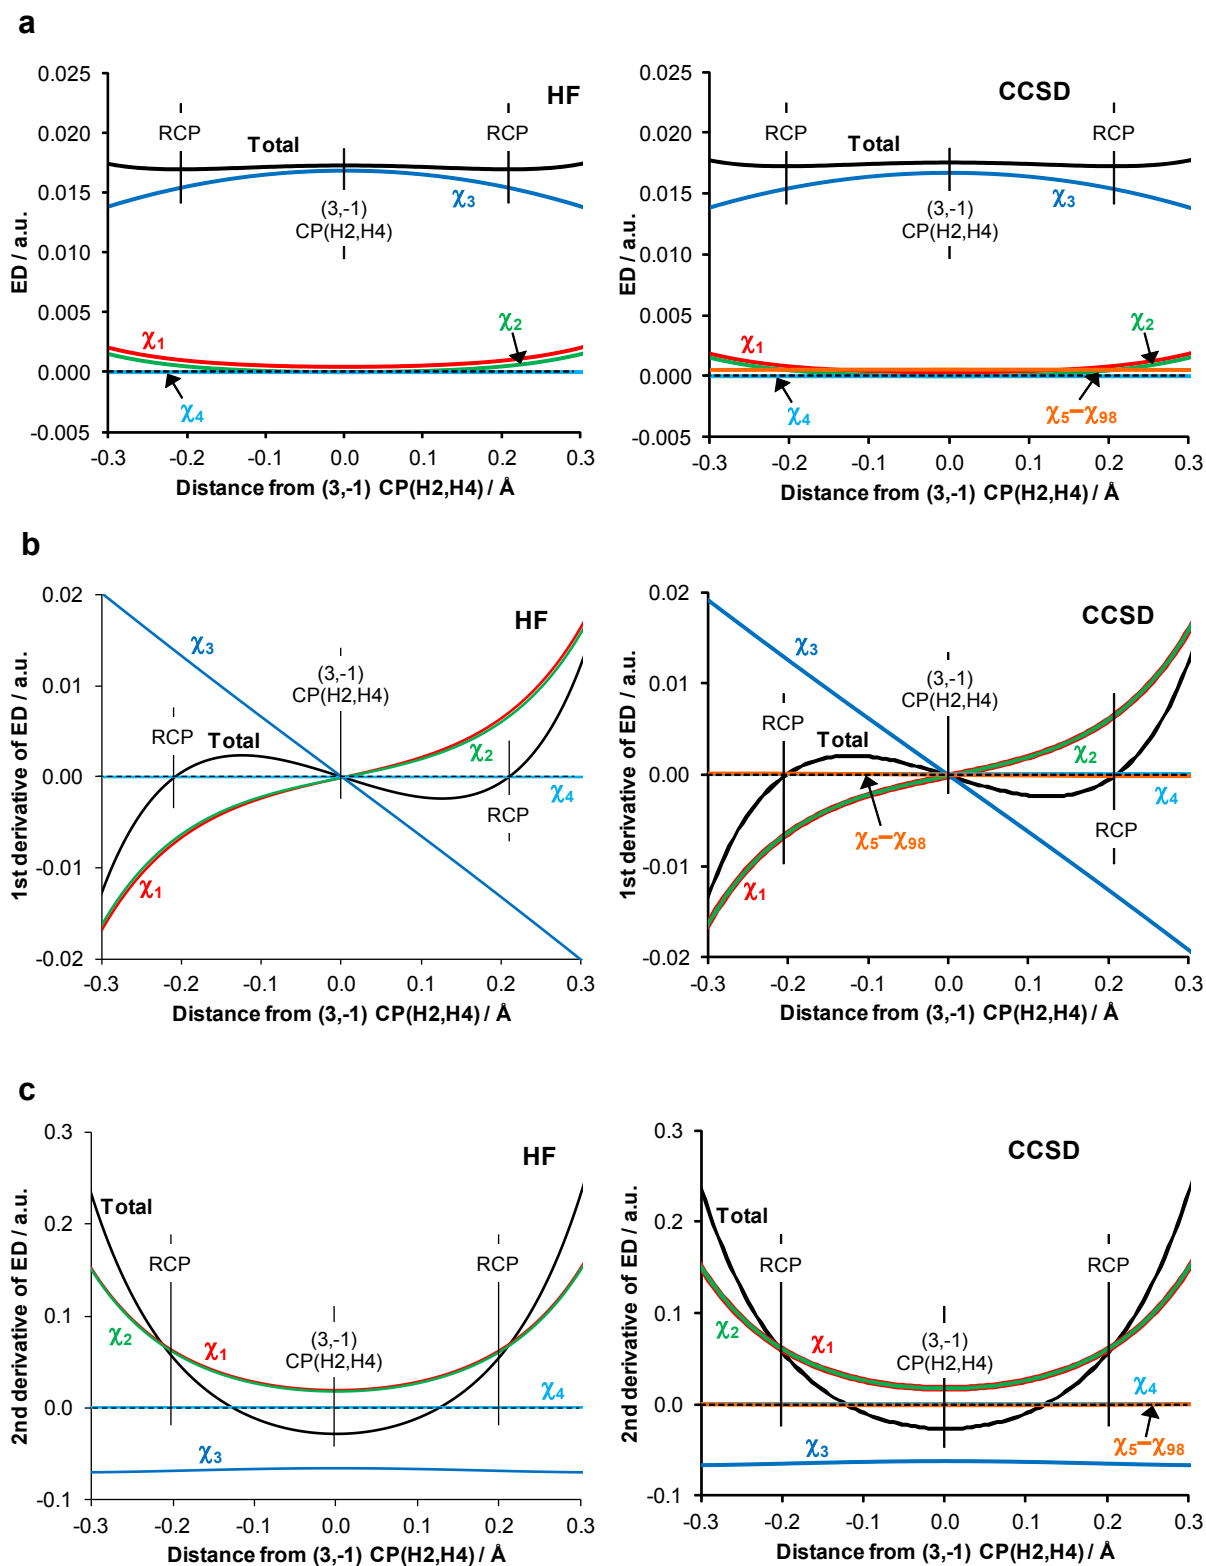

**Figure 7.4.** 1D-cross-sections along  $v_{\text{H}_2\text{LH}_4}$  of MOs (HF) and NOs (CCSD) of the  $\text{Li}_2\text{H}_2$  molecule. a) Total density contribution, b) directional partial 1<sup>st</sup> derivative and c) directional partial 2<sup>nd</sup> derivative.

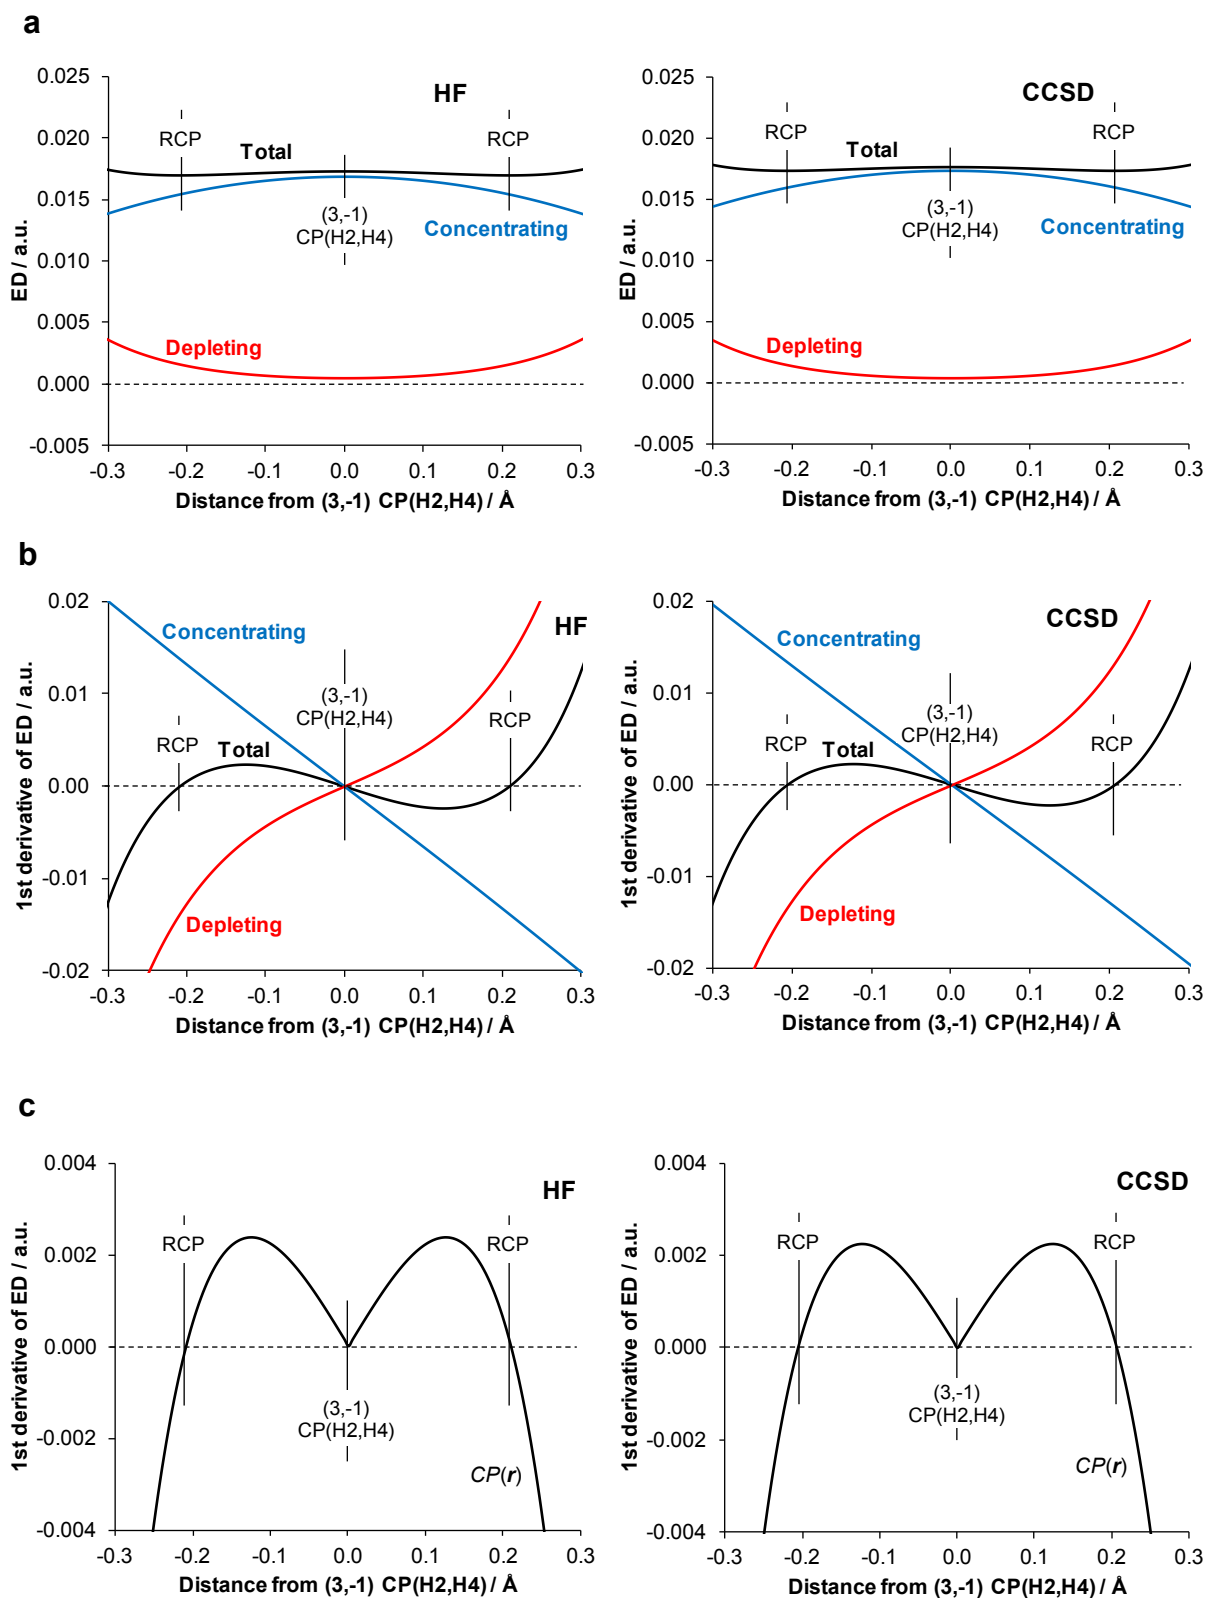

**Figure 7.5.** 1D-cross-sections along  $v_{H2,H4}$  of MOs (HF) and NOs (CCSD) of the  $Li_2H_2$  molecule with all concentrating or depleting orbitals grouped separately. a) Total density contribution, b) directional partial 1<sup>st</sup> derivative and c)  $CP(r)$  function.

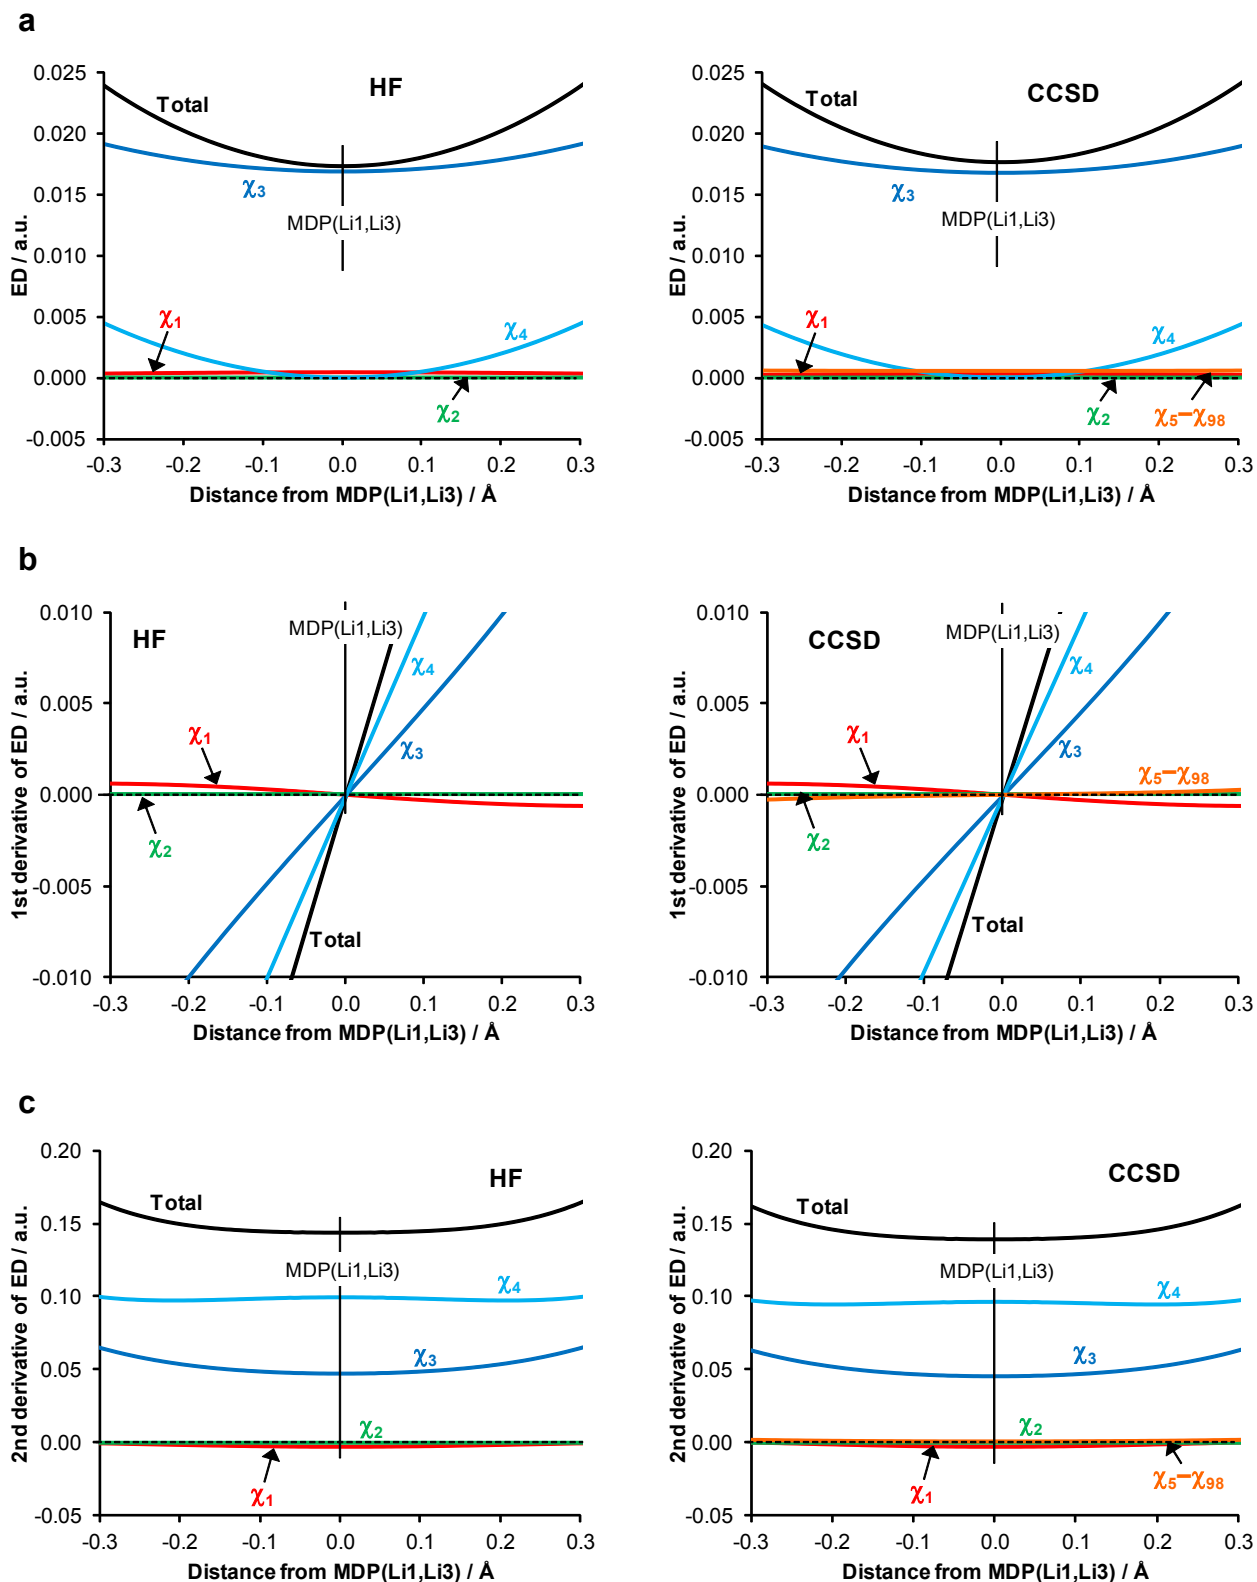

**Figure 7.6.** 1D-cross-sections along  $v_{\text{Li1Li3}}$  of MOs (HF) and NOs (CCSD) of the  $\text{Li}_2\text{H}_2$  molecule. a) Total density contribution, b) directional partial 1<sup>st</sup> derivative and c) directional partial 2<sup>nd</sup> derivative.

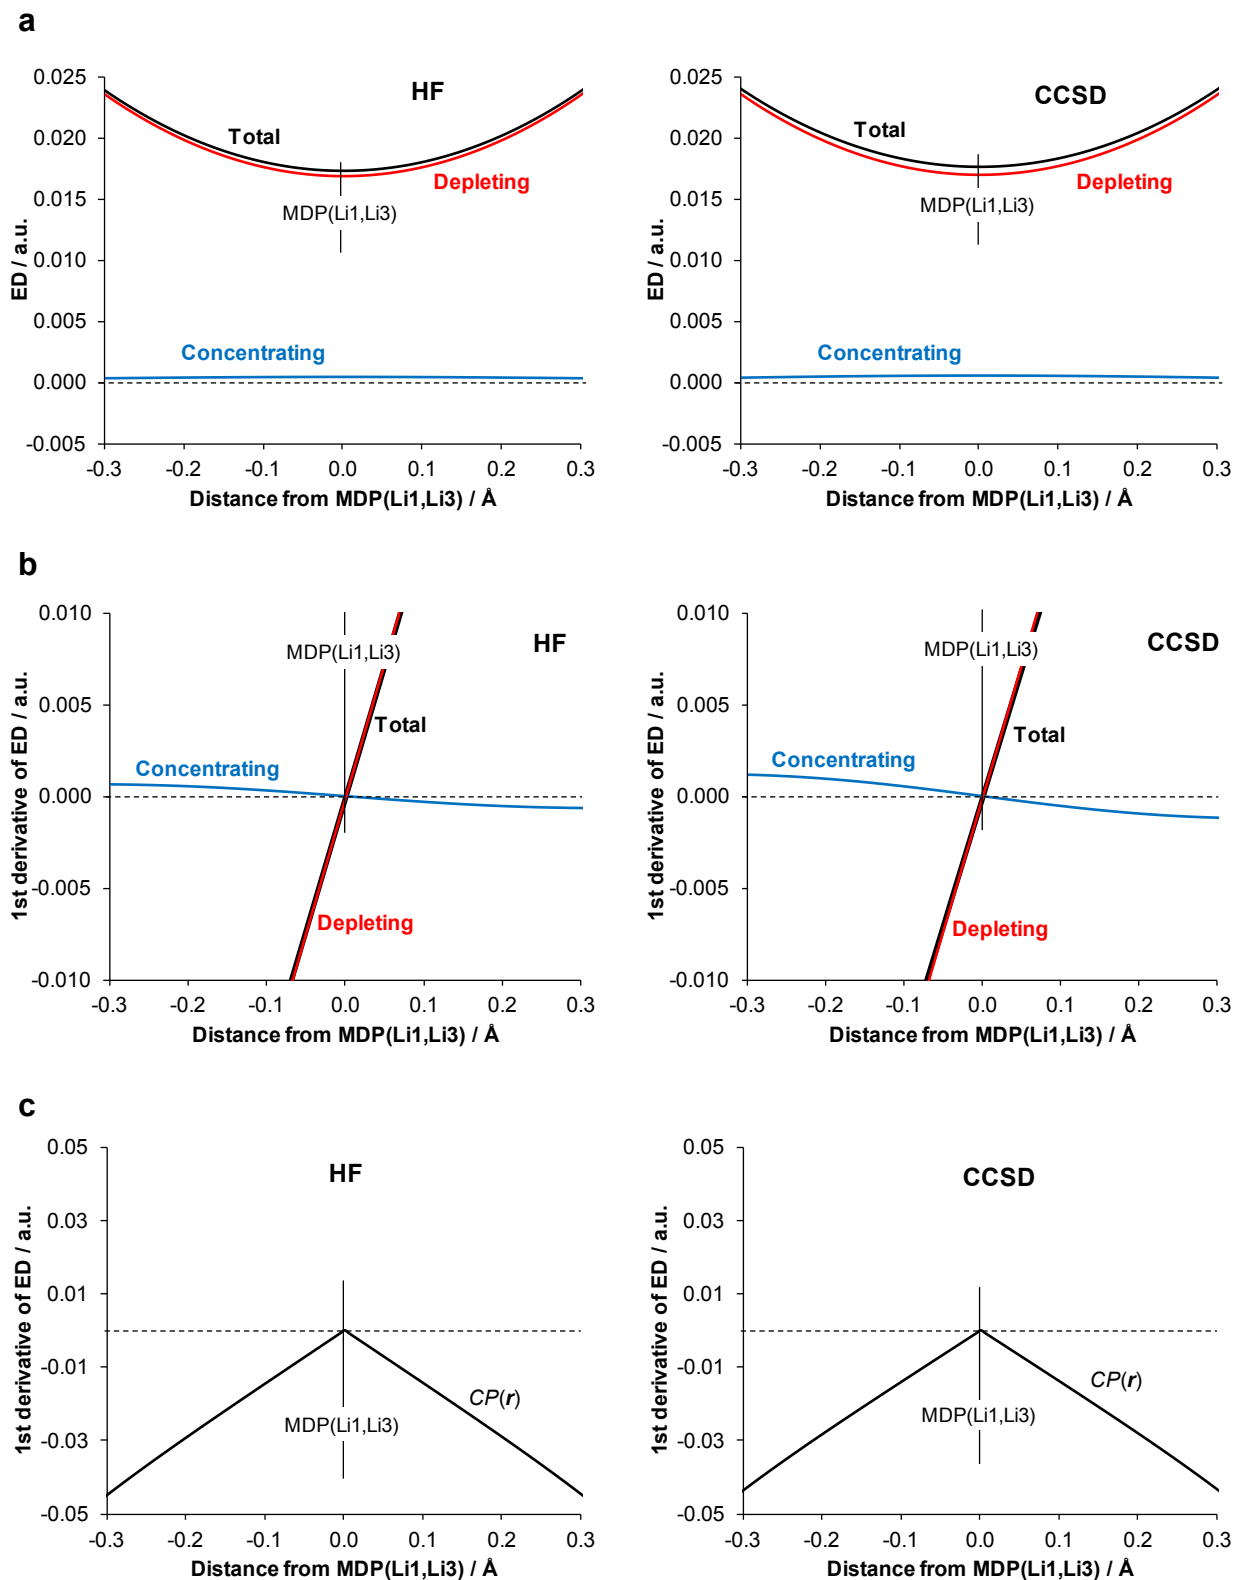

**Figure 7.7.** 1D-cross-sections along  $v_{Li1Li3}$  of MOs (HF) and NOs (CCSD) of the  $Li_2H_2$  molecule with all concentrating or depleting orbitals grouped separately. a) Total density contribution, b) directional partial 1<sup>st</sup> derivative and c)  $CP(r)$  function.
